# Supplementary material
Source: MDPI journal article supplement (https://www.mdpi.com/2673-527X/1/3/17)
Supplement: s1 [file s1]

# **Evaluation of a meta-analysis of ambient air quality as a risk factor for asthma exacerbation**

## **Supplemental Information (SI) files**

Warren B. Kindzierski,<sup>a\*</sup> S. Stanley Young,<sup>b</sup> Terry G. Meyer<sup>c</sup> and John D. Dunn<sup>d</sup>

<sup>a</sup> School of Public Health, University of Alberta, Edmonton, Alberta, Canada  
(<http://orcid.org/0000-0002-3711-009X>)

<sup>b</sup> CGStat, Raleigh, NC, USA (<https://orcid.org/0000-0001-9449-5478>)

<sup>c</sup> Outcome Based Medicine, Raleigh, NC, USA

<sup>d</sup> 401 Rocky Hill Road, Brownwood, TX, USA

\* Corresponding author: School of Public Health, University of Alberta, 3-57 South Academic Building,  
11405-87 Avenue, Edmonton, Alberta, T6G 1C9 Canada; [warrenk@ualberta.ca](mailto:warrenk@ualberta.ca)

- SI 1 Estimating the Post-Study Probability of Risk Factor–Chronic Disease Research Findings in Epidemiological Observational Studies
- SI 2 List of 87 Base Studies used in the Zheng et al. (2015) Meta-analysis
- SI 3 Summary Statistics of Other Air Quality Components and Calculated p-values
- SI 4 P-value Plots and Summary Statistics of Datasets from Meta-analysis of Selected Cancers in Petroleum Refinery Workers after Schnatter et al. (2018)
- SI 5 P-value Plot and Summary Statistics of Datasets from Meta-analysis of Elderly Long-term Exercise Training–Mortality & Morbidity Risk after de Souto Barreto et al. (2019)
- SI 6 P-value Plot and Summary Statistics of Datasets from Meta-analysis of Smoking–Squamous Cell Carcinoma Risk after Lee et al. (2012)
- SI 7 Asthma characteristics

## Supplemental Information, SI 1

### Estimating the Theoretical Post-Study Probability of Risk Factor–Chronic Disease

#### Research Findings in Epidemiological Observational Studies

##### *a) Prevalence rates for various chronic diseases*

Crude estimates of prevalence ( $P$ ) in United States are provided below for selected chronic diseases of interest.

##### ***Respiratory Diseases***

Asthma among total population –  $P = 0.079$  (2017)<sup>1</sup>

Chronic Obstructive Pulmonary Disease (COPD) among adults  $\geq 18$  years old –  $P = 0.059$   
(during 2014–2015)<sup>2</sup>

##### ***Heart Disease (includes coronary heart disease, angina or heart attack)***

Heart disease among adults  $\geq 18$  years old –  $P = 0.056$  (2018)<sup>3</sup>

##### ***Diabetes***

Diabetes among total population –  $P = 0.094$  (2015)<sup>4</sup>

##### ***Cancers***

Breast cancer among females  $\geq 35$  years old –  $P = 0.037$  (2016)<sup>5</sup>

Prostate cancer among males  $\geq 55$  years old –  $P = 0.072$  (2016)<sup>6</sup>

Colorectal cancer among total population –  $P = 0.0040$  (2016)<sup>7</sup>

Lung & Bronchus among total population –  $P = 0.0017$  (2017)<sup>8</sup>

**b) Sources:**

- 1 Centers for Disease Control and Prevention, U.S. Department of Health & Human Services, Atlanta, GA – Data, Statistics, and Surveillance, Asthma Surveillance Data, <https://www.cdc.gov/asthma/asthmaadata.htm> (accessed 10 August 2019).
- 2 COPD Foundation, Denver, CO – National and State Estimates of COPD Morbidity and Mortality — United States, 2014-201, <https://journal.copdfoundation.org/jcopdf/id/1209/National-and-State-Estimates-of-COPD-Morbidity-and-Mortality-United-States-2014-2015> (accessed 10 August 2019).
- 3 Centers for Disease Control and Prevention, U.S. Department of Health & Human Services, Atlanta, GA – Trends in Cancer and Heart Disease Death Rates Among Adults Aged 45–64: United States, 1999–2017, National Vital Statistics Reports, Vol. 68, No. 5, May 22, 2019, [https://www.cdc.gov/nchs/data/nvsr/nvsr68/nvsr68\\_05-508.pdf](https://www.cdc.gov/nchs/data/nvsr/nvsr68/nvsr68_05-508.pdf) (accessed 10 August 2019).
- 4 Centers for Disease Control and Prevention, U.S. Department of Health & Human Services, Atlanta, GA – National Diabetes Statistics Report, 2017, Estimates of Diabetes and Its Burden in the United States, <https://www.cdc.gov/diabetes/pdfs/data/statistics/national-diabetes-statistics-report.pdf> (accessed 10 August 2019).
- 5 Estimate of number of females living with breast cancer in 2016: National Cancer Institute, Surveillance, Epidemiology, and End Results (SEER) Program, Bethesda, MD – Cancer Stat Facts: Female Breast Cancer, <https://seer.cancer.gov/statfacts/html/breast.html> (accessed 16 October 2019) (Note, of females living with breast cancer it was assumed that 4% were <35 yr old and 96% ≥35 yr old) & Estimate of number of females living in 2016: United States of America 2016 population, <https://www.populationpyramid.net/united-states-of-america/2016/> (accessed 16 October 2019).
- 6 Estimate of number of males living with prostate cancer in 2016: National Cancer Institute, SEER Program, Bethesda, MD – Cancer Stat Facts: Prostate Cancer, <https://seer.cancer.gov/statfacts/html/prost.html> (accessed 16 October 2019) (Note, of males living with prostate cancer it was assumed that 2% were <55 yr old and 98% ≥55 yr old) & Estimate of number of males living in 2016: United States of America 2016 population, <https://www.populationpyramid.net/united-states-of-america/2016/> (accessed 16 October 2019).
- 7 Estimate of number of people living with colorectal cancer in 2016: National Cancer Institute, SEER Program, Bethesda, MD – Cancer Stat Facts: Colorectal Cancer, <https://seer.cancer.gov/statfacts/html/colorect.html> (accessed 16 October 2019) & Estimate of number of people living in 2016: United States of America 2016 population, <https://www.populationpyramid.net/united-states-of-america/2016/> (accessed 16 October 2019).
- 8 Estimate of number of people living with lung and bronchus cancer in 2016: National Cancer Institute, SEER Program, Bethesda, MD – Cancer Stat Facts: Lung and Bronchus Cancer, <https://seer.cancer.gov/statfacts/html/lungb.html> (accessed 16 October 2019) & Estimate of number of people living in 2016: United States of America 2016 population, <https://www.populationpyramid.net/united-states-of-america/2016/> (accessed 16 October 2019).

## 2. Theoretical post-study probabilities of a research finding being true

Our interest is in estimating the theoretical post-study probability of an outcome being true for a single observational study of risk factor–chronic disease relationships. An outcome may either be one that is a positive association (+ve), i.e., one that is statistically significant with  $p\text{-value} \leq .05$ ; or a negative or null association (-ve), i.e., one that is not statistically significant with  $p\text{-value} > .05$ . Using a Bayesian argument, the former outcome may either be a true or false positive association and the latter outcome may either be a false or true negative (null) association.

### a) Disease prevalence ( $P$ )

We first provide a formal definition of prevalence ( $P$ ):

$P =$  The number of persons with a disease divided by the total population at risk at a particular point in time (Wassertheil-Smoller 1995).<sup>1</sup>

We break this down further as:

$d^+ =$  Those in the population under study with the disease.

$d^- =$  Those in the population under study without the disease.

$d^+ + d^- =$  Total population at risk under study.

$$\therefore P = d^+ / (d^+ + d^-) \quad (1)$$

Odds of a particular outcome, in this case odds in favor of  $d^+$  given  $d^+$  and  $d^-$ , is:<sup>1</sup>

$$\text{Odds}(d^+) = d^+ / d^- \quad (2)$$

Probability ( $P$ ) of outcome  $d^+$  is related to odds:<sup>1</sup>

$$P(d^+) = \text{Odds}(d^+) / [\text{Odds}(d^+) + 1] \quad (3)$$

Equation (2) is the same as the Ioannidis (2005)<sup>2</sup> definition of  $R$  being the “number of true relationships to no relationships among those tested in the field” (i.e.,  $\text{Odds}(d^+) \equiv R$ ).

Also, equation (3) is the same as the Ioannidis (2005)<sup>2</sup> definition of “pre-study probability of a relationship being true” (i.e.,  $P(d^+) = \text{Odds}(d^+) / [\text{Odds}(d^+) + 1] \equiv R / (R + 1)$ ).

If we substitute equation (2) into equation (3) and rearrange, we get  $P(d^+) = d^+ / (d^+ + d^-)$ , which is the same as the prevalence rate of a disease ( $P$ ). Thus the “pre-study probability of a relationship being true” can be represented by the prevalence rate of a disease ( $P$ ) for our purposes. As our interest is in estimating the theoretical post-study probability of an outcome

being true as a function of  $P$ , we conservatively assume that all those in the population with the disease (i.e.,  $d^+$ ) being studied are due to the specific risk factor we are examining.

*b) 2 x 2 Table of true relationships and study findings in absence of bias*

Let us consider a 2 x 2 table of measures of association between ‘true relationships’ and ‘study findings’ in the absence of bias for a single observational study of risk factor–chronic disease relationships (refer to *Illustration 1*). Hrudey and Leiss (2003)<sup>3</sup> and Baduashvili et al. (2020)<sup>4</sup> are used to derive our 2 x 2 table.

|                          |                        | <b>True Relationship<br/>of a Risk Factor</b>                                              |                                                                                                    |                         |
|--------------------------|------------------------|--------------------------------------------------------------------------------------------|----------------------------------------------------------------------------------------------------|-------------------------|
|                          |                        | Causes disease                                                                             | Does not causes disease                                                                            | <b>Total</b>            |
| <b>Study<br/>Finding</b> | Causes disease         | <b>True Positive<br/>association (TP)</b><br>with rate = Se<br>(Sensitivity) = $1 - \beta$ | <b>False Positive<br/>association (FP)</b><br>with rate = $\alpha$                                 | <b>= TP + FP</b>        |
|                          | Does not cause disease | <b>False Negative<br/>association (FN)</b><br>with rate = $\beta$                          | <b>True Negative (null)<br/>association (TN)</b><br>with rate = Sp<br>(Specificity) = $1 - \alpha$ | <b>= FN + TN</b>        |
|                          | <b>Total</b>           | <b>= TP + FN</b>                                                                           | <b>= FP + TN</b>                                                                                   | <b>= <math>c</math></b> |

***Illustration 1. 2 x 2 table of true relationships and study findings given  $c$  relationships probed/tested*** (after Hrudey and Leiss 2003<sup>3</sup> and Baduashvili et al. 2020<sup>4</sup>).

(note: TP = # of true positive relationships, TN = # of true negative (null) relationships, FP = # of false positive relationships, FN = # of false negative (null) relationships;  $\alpha$  = Type I error rate,  $\beta$  = Type II error rate)

For  $c$  risk factor–disease relationships probed/tested in a single study, we can derive the following from *Illustration 1*:

$$\text{Number of true +ve associations, } N(\text{TP}) = c \times \text{Se (sensitivity)} \times P = c(1 - \beta)P \quad (4)$$

$$\text{Number of false -ve associations, } N(\text{FN}) = c\beta P \quad (5)$$

$$\text{Number of true -ve associations, } N(\text{TN}) = c \times \text{Sp (specificity)} \times (1 - P) = c(1 - \alpha)(1 - P) \quad (6)$$

$$\text{Number of false +ve (FP) associations, } N(\text{FP}) = c\alpha(1 - P) \quad (7)$$

where  $\alpha$  and  $\beta$  are the Type I and Type II error rates, respectively.

$$\begin{aligned} \text{The total number of positive associations, } N[(\text{TP}) + (\text{FN})] &= \\ c(1 - \beta)P + c\beta P &= cP \end{aligned}$$

$$\begin{aligned} \text{The total number of negative associations, } N[(\text{FP}) + (\text{TN})] &= \\ c\alpha(1 - P) + c(1 - \alpha)(1 - P) &= c(1 - P) \end{aligned}$$

As a check of the bottom row in *Illustration 1*, the total number of positive and negative associations =

$$N[(\text{TP}) + (\text{FN})] + N[(\text{FP}) + (\text{TN})] = cP + c(1 - P) = c$$

Now we do a check of the far-right column in *Illustration 1*:

$$N[(\text{TP}) + (\text{FP})] = c(1 - \beta)P + c\alpha(1 - P)$$

$$N[(\text{FN}) + (\text{TN})] = c\beta P + c(1 - \alpha)(1 - P)$$

$$\therefore N[(\text{TP}) + (\text{FP})] + N[(\text{FN}) + (\text{TN})] = c(1 - \beta)P + c\alpha(1 - P) + c\beta P + c(1 - \alpha)(1 - P);$$

$$\text{rearranging...} = \{c(1 - \beta)P + c\beta P\} + \{c\alpha(1 - P) + c(1 - \alpha)(1 - P)\} = cP + c(1 - P) = c$$

### c) 2 x 2 Table of true relationships and study findings in presence of bias

Now we consider the role of bias ( $u$ ) in an observational study of risk factor–chronic disease relationships. Here we use the definition of  $u$  after Ioannidis (2005)<sup>2</sup> – *the proportion of probed analyses [relationships] that would not have been “research findings,” but nevertheless end up presented and reported as such, because of bias*. “Research findings” imply nominally significant outcomes (i.e., associations with p-value  $\leq .05$ ). Bias will transfer a portion of non-significant or null outcomes (associations with p-value  $> .05$ ) to nominally significant outcomes (associations with p-value  $\leq .05$ ).

First, we deal with positive associations – FNs & TPs. Because of bias, some outcomes initially showing up as non-significant FN associations (i.e., with p-value  $>.05$ ) will now end up being reported as significant TP associations (i.e., with p-value  $\leq .05$ ) proportional to  $u$ :

$$\therefore N(\text{FN}) \text{ in the presence of bias now becomes } = c\beta P(1 - u) \quad (8)$$

$$\therefore N(\text{TP}) \text{ in the presence of bias now becomes } = c(1 - \beta)P + uc\beta P \quad (9)$$

The total number of positive associations,  $N[(\text{TP}) + (\text{FN})] =$   
 $c(1 - \beta)P + uc\beta P + c\beta P(1 - u) = cP$

Now we deal with negative associations – TNs & FPs. Because of bias, some outcomes initially showing up as non-significant TN associations (i.e., with p-value  $>.05$ ) will now end up being reported as significant FP associations (i.e., with p-value  $\leq .05$ ) proportional to  $u$ :

$$\therefore N(\text{TN}) \text{ in the presence of bias now becomes } = c(1 - \alpha)(1 - P)(1 - u) \quad (10)$$

$$\therefore N(\text{FP}) \text{ in the presence of bias now becomes } = c\alpha(1 - P) + uc(1 - \alpha)(1 - P) \quad (11)$$

The total number of negative associations,  $N[(\text{FP}) + (\text{TN})] =$   
 $c\alpha(1 - P) + uc(1 - \alpha)(1 - P) + c(1 - \alpha)(1 - P)(1 - u)$ ; rearranging =  
 $\{c\alpha(1 - P) + c(1 - \alpha)(1 - P)\} + \{[uc(1 - \alpha)(1 - P)] - [uc(1 - \alpha)(1 - P)]\} = c(1 - P)$

As a check of the bottom row in *Illustration 1*, the total number of positive and negative associations =

$$N[(\text{TP}) + (\text{FN})] + N[(\text{FP}) + (\text{TN})] = cP + c(1 - P) = c$$

Now we do a check of the far-right column in *Illustration 1*:

$$N[(\text{TP}) + (\text{FP})] = c(1 - \beta)P + uc\beta P + c\alpha(1 - P) + uc(1 - \alpha)(1 - P)$$

$$N[(\text{FN}) + (\text{TN})] = c\beta P(1 - u) + c(1 - \alpha)(1 - P)(1 - u)$$

$$\therefore N[(\text{TP}) + (\text{FP})] + N[(\text{FN}) + (\text{TN})] = c(1 - \beta)P + uc\beta P + c\alpha(1 - P) + uc(1 - \alpha)(1 - P) +$$

$$c\beta P(1 - u) + c(1 - \alpha)(1 - P)(1 - u)$$
; rearranging =  
 $\{c\alpha(1 - P) + c(1 - \alpha)(1 - P)\} + cP + \{[uc(1 - \alpha)(1 - P)] - [uc(1 - \alpha)(1 - P)]\} + \{uc\beta P - uc\beta P\} +$ 
 $\{c\beta P - c\beta P\} = c(1 - P) + cP = c$

*d) Theoretical post-study probability of an outcome being true*

The positive predictive value (PPV)<sup>c</sup> is used to represent the theoretical post-study probability of a positive outcome being true in the presence of bias:

$$PPV = N(TP)/N[(TP) + (FP)] \quad (12)$$

$$\therefore PPV = [(1 - \beta)P + u\beta P] / [(1 - \beta)P + u\beta P + \alpha(1 - P) + u(1 - \alpha)(1 - P)] \quad (13)$$

The negative predictive value (NPV)<sup>c</sup> is used to represent the theoretical post-study probability of a negative (i.e., null) outcome being true in the presence of bias:

$$NPV = N(TN)/N[(FN) + (TN)] \quad (12)$$

$$\therefore NPV = [(1 - \alpha)(1 - P)(1 - u)] / [\beta P(1 - u) + (1 - \alpha)(1 - P)(1 - u)] \quad (13)$$

*e) Sources*

- 1 Wassertheil-Smoller S. 1995. Biostatistics and Epidemiology A Primer for Health Professionals. New York, NY: Springer-Verlag.
- 2 Ioannidis JPA. 2005. Why most published research findings are false. PLoS Med 2(8):e124. <https://doi.org/10.1371/journal.pmed.0020124>.
- 3 Hrudey SE, Leiss W. 2003. Risk management and precaution: Insights on the cautious use of evidence. Environ Health Perspect 111(13):1577–1581. <https://doi.org/10.1289/ehp.6224>.
- 4 Baduashvili A, Evans AT, Cutler T. 2020. How to understand and teach P values: a diagnostic test framework. J Clin Epidemiol 122:49–55. <https://doi.org/10.1016/j.jclinepi.2020.03.003>.



## Supplemental Information, SI 2

### List of 87 Base Studies used in the Zheng et al. 2015 Meta-analysis

(Note: 'number' preceding reference is the citation number used by Zheng et al.)

4. Strickland MJ, et al. Short-term associations between ambient air pollutants and pediatric asthma emergency department visits. *Am J Respir Crit Care* 2010; 182: 307–316.
5. Son JY, et al. Short-term effects of air pollution on hospital admissions in Korea. *Epidemiology* 2013; 24: 545–554.
6. Mehta AJ, et al. Acute respiratory health effects of urban air pollutants in adults with different patterns of underlying respiratory disease. *Swiss Med Wkly.* 2012; 142: w13681 (17 pp).
7. Samoli E, et al. Acute effects of air pollution on pediatric asthma exacerbation: Evidence of association and effect modification. *Environ Res* 2011; 111: 418–424.
8. Andersen ZJ, et al. Size distribution and total number concentration of ultrafine and accumulation mode particles and hospital admissions in children and the elderly in Copenhagen, Denmark. *Occup Environ Med* 2008; 65: 458–466.
9. Walters S, et al. Temporal association between hospital admissions for asthma in Birmingham and ambient levels of sulphur dioxide and smoke. *Thorax* 1994; 49: 133–140.
10. Kim SY, et al. The temporal lag structure of short-term associations of fine particulate matter chemical constituents and cardiovascular and respiratory hospitalizations. *Environ Health Perspect* 2012; 120: 1094–1099.
11. Paulu C, Smith AE. Tracking associations between ambient ozone and asthma-related emergency department visits using case-crossover analysis. *J Public Health Management Practice* 2008; 14: 581–591.
12. Lee JT, et al. Air pollution and asthma among children in Seoul, Korea. *Epidemiology* 2002; 13: 481–484.
13. Delfino RJ, et al. The relationship of urgent hospital admission for respiratory illnesses to photo chemical air pollution levels. *Environ Res* 1994; 67: 1–19.
14. Sunyer J, et al. Urban air pollution and emergency admissions for asthma in four European cities: the APHEA Project. *Thorax* 1997; 52: 760–765.
15. Chardon B, et al. Air pollution and doctors' house calls for respiratory diseases in the Greater Paris area (2000–3). *Occup Environ Med* 2007; 64: 320–324.
16. Halonen JJ, et al. Urban air pollution, and asthma and COPD hospital emergency room visits. *Thorax* 2008; 63: 635–641.
17. Yang CY, et al. Air pollution and hospital admissions for asthma in a subtropical city: Taipei, Taiwan. *J Toxicol Env Heal A* 2007; 70: 111–117.
18. Tsai SS, et al. Air pollution and hospital admissions for asthma in a tropical city: Kaohsiung, Taiwan. *Inh Toxicol* 2006; 18: 549–554.
19. Wong TW, et al. Air pollution and hospital admissions for respiratory and cardiovascular diseases in Hong Kong. *Occup Environ Med* 1999; 56: 679–683.

20. Fusco D, et al. Air pollution and hospital admissions for respiratory conditions in Rome, Italy. *Eur Respir J* 2001; 17: 1143–1150.
21. Morgan G, et al. Air pollution and hospital admissions in Sydney, Australia 1990 to 1994. *Am J Public Health* 1998; 88: 1761–1766
22. Malig BJ, et al. Coarse particles and respiratory emergency department visits in California. *Am J Epidemiol*. 2013; 178(1): 58–69.
23. Laurent O, et al. Air pollution, asthma attacks, and socioeconomic deprivation: a small-area case-crossover study. *Am J Epidemiol* 2008; 168: 58–65.
24. Anderson HR, et al. Air pollution, pollens, and daily admissions for asthma in London 1987–92. *Thorax* 1998; 53: 842–848.
25. Ye F, et al. Effects of temperature and air pollutants on cardiovascular and respiratory diseases for males and females older than 65 Years of age in Tokyo, July and August 1980–1995. *Environ Health Perspect* 2001; 109: 355–359.
26. Smargiassi A, et al. Risk of asthmatic episodes in children exposed to sulfur dioxide stack emissions from a refinery point source in Montreal, Canada. *Environ Health Perspect* 2009; 117: 653–659.
27. Szyszkowicz M. Ambient air pollution and daily emergency department visits for asthma in Edmonton, Canada. *Int J Occup Med Env* 2008; 21: 25–30.
28. Lee SL, et al. Association between air pollution and asthma admission among children in Hong Kong. *Clin Exp Allergy* 2006; 36: 1138–1146.
29. Norris G, et al. An association between fine particles and asthma emergency department visits for children in Seattle. *Environ Health Perspect* 1999; 107: 489–493.
30. Hajat S, et al. Association of air pollution with daily GP consultations for asthma and other lower respiratory conditions in London. *Thorax* 1999; 54: 597–605.
31. Tenias JM, et al. Association between hospital emergency visits for asthma and air pollution in Valencia, Spain. *Occup Environ Med* 1998; 55: 541–547.
32. Stieb DM, et al. Association between ozone and asthma emergency department visits in Saint John, New Brunswick, Canada. *Environ Health Perspect* 1996; 104: 1354–1359.
33. Chew FT, et al. Association of ambient air pollution levels with acute asthma exacerbation among children in Singapore. *Allergy* 1999; 54: 320–329.
34. Petroeschevsky A, et al. Associations between outdoor air pollution and hospital admissions in Brisbane, Australia. *Arch Environ Health* 2001; 56: 37–52.
35. Magas OK, et al. Ambient air pollution and daily pediatric hospitalizations for asthma. *Env Sci Pollut Res* 2007; 14: 19–23.
36. Lee JT, et al. Effect of air pollution on asthma-related hospital admissions for children by socioeconomic status associated with area of residence. *Arch Environ Occup Health* 2006; 61: 123–130.
37. Lin M, et al. Effect of short-term exposure to gaseous pollution on asthma hospitalization in children: a bi-directional case-crossover analysis. *J Epidemiol Community Health* 2003; 57: 50–55.

38. Ko FWS, et al. Effects of air pollution on asthma hospitalization rates in different age groups in Hong Kong. *Clin Exp Allergy* 2007; 37: 1312–1319.
39. Krmpotic D, et al. Effects of traffic air pollution and hornbeam pollen on adult asthma hospitalizations in Zagreb. *Int Arch Allergy Immunol* 2011; 156: 62–68.
40. Lin M, et al. Gaseous air pollutants and asthma hospitalization of children with low household income in Vancouver, British Columbia, Canada. *Am J Epidemiol* 2004; 159: 294–303.
41. Galan I, et al. Short-term effects of air pollution on daily asthma emergency room admissions. *Eur Respir J* 2003; 22: 802–808.
42. Jazbec A, et al. Short-term effects of ambient nitrogen oxides on the number of emergency asthma cases in Zagreb, Croatia. *Arhiv za Higijenu Rada i Toksikologiju (Archives of Industrial Hygiene and Toxicology)* 1999; 50: 171–182.
43. Mohr LB, et al. Influence of season and temperature on the relationship of elemental carbon air pollution to pediatric asthma emergency room visits. *J Asthma* 2008; 45: 936–943.
44. Lin M, et al. The Influence of ambient coarse particulate matter on asthma hospitalization in children: case-crossover and time-series analyses. *Environ Health Persp* 2002; 110: 575–581.
45. Schouten JP, et al. Short term effects of air pollution on emergency hospital admissions for respiratory disease: results of the APHEA project in two major cities in The Netherlands, 1977–89. *J Epidemiol Comm H* 1996; 50: 22–29.
46. Castellsague J, et al. Short-term association between air pollution and emergency room visits for asthma in Barcelona. *Thorax* 1995; 50: 1051–1056.
47. Chakraborty P, et al. Effect of airborne *Alternaria* conidia, ozone exposure, PM<sub>10</sub> and weather on emergency visits for asthma in school-age children in Kolkata city, India. *Aerobiologia* 2014; 30: 137–148.
48. Abe T, et al. The relationship of short-term air pollution and weather to ED visits for asthma in Japan. *Am J Emerg Med* 2007; 27: 153–159.
49. Boutin-Forzano S, et al. Visits to the emergency room for asthma attacks and short-term variations in air pollution: a case-crossover study. *Respiration* 2004; 71: 134–137.
50. Pereira G, et al. A case-crossover analysis of traffic-related air pollution and emergency department presentations for asthma in Perth, Western Australia. *Med J Australia* 2010; 193: 511–514.
51. Atkinson RW, et al. Acute effects of particulate air pollution on respiratory admissions: results from APHEA 2 project. *Am J Respir Crit Care Med* 2001; 164: 1860–1866.
52. Silverman RA, Ito K. Age-related association of fine particles and ozone with severe acute asthma in New York City. *J Allergy Clin Immunol* 2010; 125: 367–373.
53. Barnett AG, et al. Air pollution and child respiratory health: A case-crossover study in Australia and New Zealand. *Am J Respir Crit Care Med* 2005; 171:1272–1278.
54. Jalaludin BB, et al. Air pollution and ED visits for asthma in Australian children: a case-crossover analysis. *Int Arch Occup Environ Health* 2008; 81: 967–974.
55. Medina S, et al. Air pollution and doctors' house calls: results from the ERPURS system for monitoring the effects of air pollution on public health in Greater Paris, France, 1991–1995. *Environ Res* 1997; 75: 73–84.

56. Jaffe DH, et al. Air pollution and emergency department visits for asthma among Ohio Medicaid recipients, 1991–1996. *Environ Res* 2003; 91: 21–28.
57. Lavigne E, et al. Air pollution and emergency department visits for asthma in Windsor, Canada. *Can J Public Heal* 2012; 103: 4–8.
58. Stieb DM, et al. Air pollution and emergency department visits for cardiac and respiratory conditions: a multi-city time-series analysis. *Environ Heal* 2009; 8: 25 (13 pp).
59. Romero-Placeres M, et al. Air pollution, bronchial asthma, and acute respiratory infections in minors, Habana City. *Salud publica de Mexico* 2004; 46: 222–233.
60. Wilson AM, et al. Air pollution, weather, and respiratory emergency room visits in two northern New England cities: an ecological time-series study. *Environ Res* 2005; 97: 312–321.
61. Chimonas MAR, Gessner BD. Airborne particulate matter from primarily geologic, non-industrial sources at levels below National Ambient Air Quality Standards is associated with outpatient visits for asthma and quick-relief medication prescriptions among children less than 20 years old enrolled in Medicaid in Anchorage, Alaska. *Environ Res* 2007; 103: 397–404.
62. Sluaghter JC, et al. Association between particulate matter and emergency room visits, hospital admissions and mortality in Spokane, Washington. *J Expo Anal Env Epid* 2005; 15: 153–159.
63. Li S, et al. Association of daily asthma emergency department visits and hospital admissions with ambient air pollutants among the pediatric Medicaid population in Detroit: Time-series and time-stratified case-crossover analyses with threshold effects. *Environ Res* 2011; 111: 1137–1147.
64. Mar T, et al. Associations between asthma emergency visits and particulate matter sources, including diesel emissions from stationary generators in Tacoma, Washington. *Inhal Toxicol* 2010; 22: 445–448.
65. Amancio CT, Nascimento LFC. Asthma and air pollutants: a time series study. *Rev Assoc Med Bras* 2012; 58: 302–307.
66. Cirera L, et al. Daily effects of air pollutants and pollen types on asthma and COPD hospital emergency visits in the industrial and Mediterranean Spanish city of Cartagena. *Allergol Immunopathol (Madr)* 2012; 40: 231–237.
67. Cassino C, et al. Cigarette smoking and ozone-associated emergency department use for asthma by adults in New York City. *Am J Respir Crit Care Med* 1999; 159: 1773–1779.
68. Iskandar A, et al. Coarse and fine particles but not ultrafine particles in urban air trigger hospital admission for asthma in children. *Thorax* 2012; 67: 252–257.
69. Evans KA, et al. Increased ultrafine particles and carbon monoxide concentrations are associated with asthma exacerbation among urban children. *Environ Res* 2014, 129: 11–19.
70. Sheppard L, et al. Effects of ambient air pollution on nonelderly asthma hospital admissions in Seattle, Washington, 1987–1994. *Epidemiology* 1999; 10: 23–30.
71. Morgan G, et al. Effects of bushfire smoke on daily mortality and hospital admissions in Sydney, Australia. *Epidemiology* 2010; 21: 47–55.
72. Yamazaki S, et al. Association of ambient air pollution and meteorological factors with primary care visits at night due to asthma attack. *Environ Health Prev Med* 2013; 18: 401–406.

73. Neidell M, Kinney PL. Estimates of the association between ozone and asthma hospitalizations that account for behavioral responses to air quality information. *Environ Science Policy* 2010; 13: 97–103.
74. Santus P, et al. How air pollution influences clinical management of respiratory diseases. A case-crossover study in Milan. *Respir Res* 2012; 13: 95 (12 pp).
75. Sunyer J, et al. Respiratory effects of sulphur dioxide: a hierarchical multicity analysis in the APHEA 2 study. *Occup Environ Med* 2003; 60: e2 (3 pp).
76. Babin S, et al. Medicaid patient asthma-related acute care visits and their associations with ozone and particulates in Washington, DC, from 1994–2005. *Inter J Env Res Pub Heal* 2008; 18: 209–221.
77. Yamazaki S, et al. Modifying Effect of age on the association between ambient ozone and nighttime primary care visits due to asthma attack. *J Epidemiol* 2009; 19: 143–151.
78. Mar TF, Koenig JQ. Relationship between visits to emergency departments for asthma and ozone exposure in greater Seattle, Washington. *Ann Allergy Asthma Immunol* 2009; 103: 474–479.
79. Hernandez-Cadena L, et al. Relationship between emergency room visits for respiratory disease and atmospheric pollution in Ciudad Juárez, Chihuahua. *Salud publica de Mexico* 2000; 42: 288–297.
80. Gouveia N, Fletcher T. Respiratory diseases in children and outdoor air pollution in San Paulo, Brazil: a time series analysis. *Occup Environ Med* 2000; 57: 477–483.
81. Fung KY, et al. Air pollution and daily hospitalization rates for cardiovascular and respiratory diseases in London, Ontario. *Int J Environ Stud*. 2005; 62: 677–685.
82. Ito K, et al. Characterization of PM<sub>2.5</sub>, gaseous pollutants, and meteorological interactions in the context of time-series health effects models. *J Expo Sci Environ Epidemiol* 2007; 17: S45–S60.
83. Hua J, et al. Acute effects of black carbon and PM<sub>2.5</sub> on children asthma admissions: A time-series study in a Chinese city. *Sci Tot Envir* 2014; 481: 433–438.
84. Cadelis G, et al. Short-term effects of the particulate pollutants contained in Saharan dust on the visits of children to the emergency department due to asthmatic conditions in Guadeloupe (French Archipelago of the Caribbean). *PLoS One* 2014; 9: e91136 (11 pp).
85. Cheng MH, et al. Fine particulate air pollution and hospital admission for asthma: A case-crossover study in Taipei. *J Toxicol Environ Health, Part A*, 2014; 77: 1071–1083.
86. Cai J, et al. Acute effects of air pollution on asthma hospitalization in Shanghai, China. *Environ Pollut* 2014; 191: 139–144.
87. Gleason JA, et al. Associations between ozone, PM<sub>2.5</sub>, and four pollen types on emergency department pediatric asthma events during the warm season in New Jersey: A case-crossover study. *Environ Res* 2014; 132: 421–429.
88. Sacks JD, et al. Influence of urbanicity and county characteristics on the association between ozone and asthma emergency department visits in North Carolina. *Environ Health Perspect* 2014; 122: 506–512.
89. Raun LH, et al. Using community level strategies to reduce asthma attacks triggered by outdoor air pollution: a case crossover analysis. *Environ Health* 2014; 13: 58 (14 pp).

## 17 Base Studies Randomly Selected for Evaluation of Analysis Search Space

(Note: 'number' preceding reference is the citation number used by Zheng et al.)

Initial 10 base studies selected:

3. Thompson AJ, Shields MD. Acute asthma exacerbations and air pollutants in children living in Belfast, Northern Ireland. *Arch Environ Health* 2001; 56: 234–241.
18. Tsai SS, et al. Air pollution and hospital admissions for asthma in a tropical city: Kaohsiung, Taiwan. *Inhal Toxicol* 2006; 18: 549–554.
23. Laurent O, et al. Air pollution, asthma attacks, and socioeconomic deprivation: a small-area case-crossover study. *Am J Epidemiol* 2008; 168: 58–65.
44. Lin M, et al. The Influence of ambient coarse particulate matter on asthma hospitalization in children: case-crossover and time-series analyses. *Environ Health Persp* 2002; 110: 575–581.
47. Chakraborty P, et al. Effect of airborne *Alternaria* conidia, ozone exposure, PM<sub>10</sub> and weather on emergency visits for asthma in school-age children in Kolkata city, India. *Aerobiologia* 2014; 30: 137–148.
48. Abe T, et al. The relationship of short-term air pollution and weather to ED visits for asthma in Japan. *Am J Emerg Med* 2007; 27: 153–159.
69. Evans KA, et al. Increased ultrafine particles and carbon monoxide concentrations are associated with asthma exacerbation among urban children. *Environ Res* 2014; 129: 11–19.
70. Sheppard L, et al. Effects of ambient air pollution on nonelderly asthma hospital admissions in Seattle, Washington, 1987–1994. *Epidemiology* 1999; 10: 23–30.
80. Gouveia N, Fletcher T. Respiratory diseases in children and outdoor air pollution in San Paulo, Brazil: a time series analysis. *Occup Environ Med* 2000; 57: 477–483.
83. Hua J, et al. Acute effects of black carbon and PM<sub>2.5</sub> on children asthma admissions: A time-series study in a Chinese city. *Sci Tot Envir* 2014; 481: 433–438.

Additional 7 base studies selected:

8. Andersen ZJ, et al. Size distribution and total number concentration of ultrafine and accumulation mode particles and hospital admissions in children and the elderly in Copenhagen, Denmark. *Occup Environ Med* 2008; 65: 458–466.
15. Chardon B, et al. Air pollution and doctors' house calls for respiratory diseases in the Greater Paris area (2000–3). *Occup Environ Med* 2007; 64: 320–324.
31. Tenias JM, et al. Association between hospital emergency visits for asthma and air pollution in Valencia, Spain. *Occup Environ Med* 1998; 55: 541–547.
35. Magas OK, et al. Ambient air pollution and daily pediatric hospitalizations for asthma. *Env Sci Pollut Res* 2007; 14: 19–23.
57. Lavigne E, et al. Air pollution and emergency department visits for asthma in Windsor, Canada. *Can J Public Health* 2012; 103: 4–8.
64. Mar T, et al. Associations between asthma emergency visits and particulate matter sources, including diesel emissions from stationary generators in Tacoma, Washington. *Inhal Toxicol* 2010; 22: 445–448.
74. Santus P, et al. How air pollution influences clinical management of respiratory diseases. A case-crossover study in Milan. *Respir Res* 2012; 13: 95.

## Details of the 87 base studies included in the Zheng et al. 2015 meta-analysis

**Notes:** Data presented in the tables below obtained from Zheng et al. (2015).

Study: '#', 'Name', 'year': Zheng et al. 2015 citation number, first author, year published.

Quality score: 0 (low) to 5 (high quality); ICD: International Classification of Diseases; ICPC2: International Classification of Primary Care 2; GP: GP's house calls;

NAEPP: National Asthma Education and Prevention Program; PC: primary care visits; TS: time-series; CC: case crossover.

Default concentration for CO in mg/m<sup>3</sup> and for NO<sub>2</sub>, SO<sub>2</sub>, PM<sub>10</sub> and PM<sub>2.5</sub> all in µg/m<sup>3</sup> is 24-h averaged concentration; and for O<sub>3</sub> in µg/m<sup>3</sup> is 8-hr max concentration.

| Study                                                  | Location, Period                         | Quality score    | Sample size | Population        | Type of study | Pollutants & concentration |                  |                   |                 |                 |                | Measurement quality score (0 or 1 point) | Lag pattern (single day/mean days) | Adjustments (long-term trend, seasonality, temperature, humidity, pressure, day for the week, holiday and influenza epidemics) |
|--------------------------------------------------------|------------------------------------------|------------------|-------------|-------------------|---------------|----------------------------|------------------|-------------------|-----------------|-----------------|----------------|------------------------------------------|------------------------------------|--------------------------------------------------------------------------------------------------------------------------------|
|                                                        |                                          |                  |             |                   |               | CO                         | PM <sub>10</sub> | PM <sub>2.5</sub> | SO <sub>2</sub> | NO <sub>2</sub> | O <sub>3</sub> |                                          |                                    |                                                                                                                                |
| <b>Base studies with emergency room visit indices:</b> |                                          |                  |             |                   |               |                            |                  |                   |                 |                 |                |                                          |                                    |                                                                                                                                |
| 3, Thompson AJ, 2001                                   | Belfast, Northern Ireland, 3 yr          | 5                | -           | Children          | TS            | 0.65                       | 28.4             | -                 | 47.1            | 43.6            | 38.4           | 1                                        | Both                               | long-term trend, seasonality, temperature, humidity, day of week, public holiday                                               |
| 14, Sunyer J, 1997                                     | Barcelona, Helsinki, Paris, London, 6 yr | 5                | 75190       | Children + adults | TS            |                            |                  |                   | 27.8            | 49.8            | 43.8           | 1                                        | Both                               | long-term trend, seasonality, temperature, humidity, day-of-week, influenza epidemics                                          |
| 15, Chardon B, 2007                                    | Paris, 3 yr                              | 5/4 <sup>b</sup> | 8027        | General           | TS            |                            | 23.0             | 14.7              |                 | 44.4            |                | 1/0 <sup>b</sup>                         | Cumulative                         | long-term trends, seasonality, temperature, humidity, day-of-week, influenza epidemic, pollen                                  |
| 16, Halonen JI, 2008                                   | Helsinki, Finland, 6 yr                  | 5                | 4807        | General           | TS            | 0.5 <sup>a</sup>           |                  | 9.5               |                 | 28.2            |                | 1                                        | Single                             | long-term trends, seasonality, temperature, humidity, day-of-week, public holiday, influenza epidemics                         |
| 30, Hajat S, 1999                                      | London, UK, 3 yr                         | 5                | 38653       | General           | TS            | 1.0                        | 28.5             |                   | 21.2            | 69.0            | 37.5           | 1                                        | Both                               | long term trend, seasonality, temperature, humidity, day-of-week, influenza epidemic                                           |
| 41, Galan I, 2003                                      | Madrid, Spain, 3 yr                      | 5                | 4827        | General           | TS            |                            | 32.1             |                   | 23.6            | 67.1            | 45.8           | 1                                        | Single                             | long-term trend, seasonality, temperature, humidity, pressure, day-of-week, public holiday, influenza epidemics                |

|                         |                                                                                         |                  |       |                   |    |     |      |      |                   |      |      |                  |        |                                                                                                        |
|-------------------------|-----------------------------------------------------------------------------------------|------------------|-------|-------------------|----|-----|------|------|-------------------|------|------|------------------|--------|--------------------------------------------------------------------------------------------------------|
| 51, Atkinson RW, 2001   | Barcelona, Birmingham, London, Milan, the Netherlands, Paris, Rome, and Stockholm, 4 yr | 5                | -     | General           | TS |     | 29.3 |      |                   |      |      | 1                | Single | long-term trend, seasonality, temperature, humidity, day for the week, holiday and influenza epidemics |
| 55, Medina S, 1997      | Paris, France, 4 yr                                                                     | 5                | -     | General           | TS |     |      |      | 19.0              | 56.0 | 34.0 | 1                | Both   | long-term trend, seasonality, temperature, humidity, day-of-week, influenza epidemics                  |
| 58, Stieb DM, 2009      | Canada (Montreal, Ottawa, Edmonton, Saint John, Halifax, Toronto, Vancouver), 10 yr     | 5/4 <sup>b</sup> | 83563 | General           | TS | 0.8 | 8.3  | 20.6 | 14.6              | 37.6 | 40.0 | 0/1 <sup>a</sup> | Single | long-term trend, seasonality, temperature, humidity, day-of-week, holiday                              |
| 60, Wilson AM, 2005     | Portland, Maine, Manchester, New Hampshire, 2 yr                                        | 5                | 7300  | General           | TS |     |      |      | 39.4 <sup>b</sup> |      | 41.0 | 1/0(ozone)       | Single | long-term trend, seasonality, temperature, humidity, day-of-week, influenza epidemic                   |
| 75, Sunyer J, 2003      | Birmingham, London, Milan, the Netherlands, Paris, Rome, Stockholm, 2-8 yr              | 5                | -     | Children + adults | TS |     |      |      | 17.6              |      |      | 1                | Single | long-term trend, seasonality, temperature, humidity, day-of-week, holiday, influenza epidemic          |
| 27, Szyszkowicz M, 2008 | Edmonton, Canada, 10 yr                                                                 | 4                | 62563 | General           | TS | 0.9 | 22.6 | 8.5  |                   | 45.0 | 39.9 | 1                | Single | long term trend, temperature, seasonality humidity, day-of-week                                        |
| 29, Norris G, 1999      | Seattle, US, 27 mon                                                                     | 4                | 1458  | Children          | TS |     | 21.7 |      | 17.1              | 41.5 |      | 1                | Single | long term trend, seasonality temperature, humidity, day-of-week                                        |
| 31, Tenias JM, 1998     | Valencia, Spain, 3 yr                                                                   | 4                | 734   | Adults + elderly  | TS |     |      |      | 26.6              | 57.7 | 62.8 | 1                | Single | long-term trend, seasonality, temp., humidity, day-of-week, public holiday, influenza epidemics        |
| 32, Stieb DM, 1996      | Saint John, New Brunswick, Canada, 8 yr                                                 | 3                | 1163  | General           | TS |     |      |      |                   |      | 89.1 | 1                | Single | long-term trend, seasonality, temperature, humidity, day-of-week                                       |
| 43, Mohr LB, 2008       | St. Louis, US, 2 yr                                                                     | 3                | 12836 | Children          | TS |     |      | -    |                   | -    | -    | 1                | Single | long-term trend, seasonality, temperature                                                              |



|                              |                                           |   |       |                   |    |                  |       |      |                   |                   |       |   |            |                                                                                                      |
|------------------------------|-------------------------------------------|---|-------|-------------------|----|------------------|-------|------|-------------------|-------------------|-------|---|------------|------------------------------------------------------------------------------------------------------|
| 46, Castellsague J, 1995     | Barcelona, Spain, 5 yr                    | 3 | 6019  | Adults+ elderly   | TS |                  |       |      | 45.5              | 58.0              | 70.5  | 1 | Cumulative | long-term trend, seasonality, temperature, humidity, day-of-week, influenza epidemic                 |
| 47, Chakraborty P, 2013      | Kolkata city, India, 2 yr                 | 4 | 2703  | Children          | TS |                  | 3.8   |      |                   |                   | 1.3°  | 1 | -          | long term trend, seasonality, temperature, humidity                                                  |
| 56 Jaffe DH, 2003            | Cincinnati, Cleveland, and Columbus, 5 yr | 4 | 4416  | Children+ adults  | TS |                  | 49.5  |      | 28.8              | 10.1              | 35.8  | 1 | Single     | long-term trend, seasonality, temperature, humidity, day-of-week                                     |
| 64, Mar TF, 2010             | Tacoma, Washington, 3.5 yr                | 3 | 10091 | General           | TS | 1.2              |       | 12.3 |                   |                   |       | 1 | Single     | long-term trend, seasonality, temperature, humidity                                                  |
| 66, Cirera L, 2012           | Cartagena, Spain, 4 yr                    | 4 | 1617  | General           | TS |                  |       |      | 32                | 51                | 81    | 1 | Single     | long-term trend, seasonality, temperature, humidity, day-of-week, public holiday, influenza epidemic |
| 67, Cassino C, 1999          | New York, US, 3.5 yr                      | 4 | 285   | Adults            | TS | 1.2              |       |      | 29.4              | 92.4              | 37.5° | 1 | Single     | long-term trend, seasonality, temperature, humidity, day-of-week                                     |
| 76, Babin S, 2008            | Washington DC, US, 11 yr                  | 4 | 61218 | General           | TS |                  | -     | -    |                   |                   | -     | 1 | Single     | long-term trend, seasonality, temperature, humidity, day-of-week                                     |
| 78, Mar TF, 2009             | Seattle, Washington, US, 4 yr             | 3 | 3217  | Children + adults | TS |                  |       |      |                   |                   | 84.0  | 0 | Single     | long-term trend, seasonality, temperature, humidity, day-of-week                                     |
| 79, Hernandez-Cadena L, 2000 | Ciudad Juárez, Chihuahua, Mexico, 1 yr    | 4 | 2459  | General           | TS |                  | 34.46 |      |                   |                   | 110.6 | 1 | Both       | long-term trend, seasonality, temperature, humidity, day-of-week                                     |
| 82, Ito K, 2007              | New York, US, 4 yr                        | 3 |       | General           | TS | 1.6 <sup>a</sup> | 15.7  |      | 22.3              | 31.1              | 65.1  | 1 | Both       | long-term trend, seasonality, temperature, humidity, day-of-week                                     |
| 84, Cadelis G, 2014          | Guadeloupe, France, 1 yr                  | 3 | 836   | Children          | TS |                  | 19.2  |      |                   |                   |       | 1 | Both       | long-term trend, seasonality, temperature                                                            |
| 42, Jazbec A, 1999           | Zagreb, Croatia, 1.5 yr                   | 0 | 1372  | Children +adults  | TS |                  |       |      |                   | 45.1              |       | 0 | Cumulative | long-term trend, seasonality,                                                                        |
| 48, Abe T, 2007              | Tokyo, Japan, 1 yr                        | 2 | 6447  | General           | TS | 1.4              |       |      | 15.1              |                   |       | 1 | Single     | seasonality, temperature, humidity                                                                   |
| 61, Chimonas MAR, 2007       | Anchorage, Alaska, 3.5 yr                 | 2 | 11037 | Children          | TS |                  | 27.6  | 6.1  |                   |                   |       | 0 | Single     | long-term trend, seasonality, temperature                                                            |
| 4, Strickland MJ, 2010       | Atlanta, US, 11 yr                        | 5 | 91386 | Children          | CC | 1.1 <sup>b</sup> | 23.8  | 16.4 | 30.9 <sup>b</sup> | 47.8 <sup>b</sup> | 97.3  | 1 | Both       | long-term trend, seasonality, temperature, humidity, day of week and influenza epidemics             |

|                            |                          |   |         |                   |    |     |      |      |      |       |      |   |            |                                                                                                               |
|----------------------------|--------------------------|---|---------|-------------------|----|-----|------|------|------|-------|------|---|------------|---------------------------------------------------------------------------------------------------------------|
| 11, Paulu C, 2008          | Maine, US, 4 yr          | 5 | 8020    | General           | CC |     |      | 8.5  |      |       | 83.6 | 1 | Both       | long-term trend, seasonality, temperature, humidity, day of week, holiday                                     |
| 54, Jalaludin BB, 2008     | Sydney, Australia, 5 yr  | 5 | 317724  | Children          | CC | 1.0 | 16.8 | 9.4  | 3.1  | 47.6  | 67.7 | 1 | Both       | long-term trend, seasonality, temperature, humidity, day-of-week, public holiday                              |
| 57, Lavigne E, 2010        | Windsor, Canada, 7 yr    | 5 | 3728    | General           | CC | 0.4 |      | 7.3  | 5.3  | 17.4  | 41.5 | 1 | Single     | long-term trend, seasonality, temperature, humidity, day-of-week, influenza epidemic                          |
| 22, Malig BJ, 2013         | California, 4 yr         | 4 | 74978   | General           | CC |     | 35.0 | 12.1 |      |       |      | 1 | Single     | long-term trends, seasonality, temperature, humidity, day of week                                             |
| 49, Boutin-Forzano S, 2004 | Marseille, France, 1 yr  | 3 | 549     | Children + adults | CC |     |      |      | 22.5 | 34.9  | 50.1 | 1 | Single     | long-term trend, seasonality, temperature, humidity                                                           |
| 72, Yamazaki S, 2013       | Himeji, Japan, 2 yr      | 3 | 956     | Children          | CC |     | 34.3 | 21.2 |      | 22.9  | 55.3 | 1 | Single     | long-term trend, seasonality, temperature, humidity, day-of-week                                              |
| 74, Santus P, 2012         | Milan, Italy, 2 yr       | 3 | 3569    | General           | CC | 1.5 | 47.1 | 32.8 | 4.13 | 102.6 | 74.3 | 1 | Both       | long-term trend, seasonality, temperature, humidity, day-of-week                                              |
| 77, Yamazaki S, 2009       | Tokyo, Japan, 1 yr       | 4 | 403     | Children+ adults  | CC |     |      | 19.1 |      | 45.3  | 60.2 | 1 | Cumulative | long-term trend, seasonality, temperature, humidity, day-of-week, holiday                                     |
| 6, Mehta AJ, 2012          | Switzerland, 2 yr        | 1 | 147     | adults            | CC |     |      |      |      | 33.9  |      | 1 | Single     | long-term trend, influenza epidemics                                                                          |
| 23, Laurent O, 2008        | France, 5 yr             | 2 | 4677    | General           | CC |     | 22.6 |      | 8.9  | 36.0  | 57.7 | 1 | Both       | temperature, pressure, humidity, influenza epidemic and pollen count                                          |
| 50, Pereira G, 2010        | Perth, Australia, 5 yr   | 2 | 603     | Children          | CC | 0.3 |      |      |      | 12.9  |      | 1 | Single     | not declared                                                                                                  |
| 69, Evans KA, 2013         | New York, US, 3 yr       | 0 | 71      | Children          | CC | 0.5 |      | 8.6  | 15.4 |       | 55.9 | 0 | Both       | temperature, humidity                                                                                         |
| 87, Gleason JA, 2014       | New Jersey, US, 4 yr     | 5 | 21,854  | Children          | CC |     |      | -    |      |       | -    | 1 | Both       | long-term trend, seasonality, temperature, humidity, day-of-week, holiday, viral upper respiratory infections |
| 88, Sacks JD, 2014         | North Carolina, US, 3 yr | 5 | 121,621 | General           | CC |     |      |      |      |       | 93.4 | 1 | Cumulative | long-term trend, seasonality, temperature, humidity, day-of-week, holiday, viral upper respiratory infections |

|                   |                          |   |        |         |    |     |  |      |     |      |      |   |      |                                                                                                               |
|-------------------|--------------------------|---|--------|---------|----|-----|--|------|-----|------|------|---|------|---------------------------------------------------------------------------------------------------------------|
| 89, Raun LH, 2014 | Houston, Texas, US, 7 yr | 3 | 11,754 | General | CC | 0.3 |  | 10.7 | 4.3 | 21.6 | 76.7 | 0 | Both | long-term trend, seasonality, temperature, humidity, day-of-week, holiday, viral upper respiratory infections |
|-------------------|--------------------------|---|--------|---------|----|-----|--|------|-----|------|------|---|------|---------------------------------------------------------------------------------------------------------------|

| Study                                         | Location, Period                  | Quality score | Sample size | Population | Type of study | Pollutants and concentration<br>(CO in units of mg/m <sup>3</sup> ; all other pollutants in units of µg/m <sup>3</sup> ) |                  |                   |                 |                 |                | Measurement quality score (0-1 point) | Lag pattern (single day/mean days) | Adjustments (long-term trend, seasonality, temperature, humidity, pressure, day for the week, holiday and influenza epidemics) |
|-----------------------------------------------|-----------------------------------|---------------|-------------|------------|---------------|--------------------------------------------------------------------------------------------------------------------------|------------------|-------------------|-----------------|-----------------|----------------|---------------------------------------|------------------------------------|--------------------------------------------------------------------------------------------------------------------------------|
|                                               |                                   |               |             |            |               | CO                                                                                                                       | PM <sub>10</sub> | PM <sub>2.5</sub> | SO <sub>2</sub> | NO <sub>2</sub> | O <sub>3</sub> |                                       |                                    |                                                                                                                                |
| Base studies with hospital admission indices: |                                   |               |             |            |               |                                                                                                                          |                  |                   |                 |                 |                |                                       |                                    |                                                                                                                                |
| 7, Samoli E, 2010                             | metropolitan area of Athens, 3 yr | 5             | 3601        | Children   | TS            |                                                                                                                          | 43.9             |                   | 16.8            | 84.8            | 70.9           | 1                                     | Single                             | long-term trends, seasonality, temperature, humidity, day of week, public holidays and influenza epidemics                     |
| 19, Wong TW, 1999                             | Hong Kong, 1 yr                   | 5             | -           | General    | TS            |                                                                                                                          | 45.0             |                   | 17.1            | 51.4            | 24.2           | 1                                     | Both                               | long-term trends, seasonality, temperature, humidity, days-of-week, public holiday                                             |
| 20, Fusco D, 2001                             | Rome, Italy, 2 yr                 | 5             | 4635        | General    | TS            | 3.6                                                                                                                      |                  |                   | 9.1             | 86.7            | 27.0           | 1                                     | Single                             | long-term trends, seasonality, temperature, humidity, day- of-week, public holiday, influenza                                  |
| 21, Morgan G, 1998                            | Sydney, Australia, 5 yr           | 5             | -           | General    | TS            |                                                                                                                          | 19.2             |                   |                 | 30.8            | 53.6           | 1                                     | Single                             | long-term trends, seasonality, temperature, humidity, day-of-week, holiday                                                     |
| 24, Anderson HR, 1998                         | London, UK, 5 yr                  | 5             | 63039       | General    | TS            |                                                                                                                          |                  |                   | 32              | 76.4            | 33.2           | 1                                     | Both                               | Long-term trends, temperature, humidity, seasonality, days of the week, public holidays and influenza epidemics                |
| 28, Lee SL, 2006                              | Hong Kong, 5 yr                   | 5             | 26663       | Children   | TS            |                                                                                                                          | 56.1             | 45.3              | 17.7            | 64.7            | 28.6           | 1                                     | Single                             | Long-term trend, seasonality, temperature, humidity, day-of-week, public holiday, influenza epidemic                           |

|                             |                                                                    |     |        |                   |    |                  |      |      |      |       |       |   |            |                                                                                                         |
|-----------------------------|--------------------------------------------------------------------|-----|--------|-------------------|----|------------------|------|------|------|-------|-------|---|------------|---------------------------------------------------------------------------------------------------------|
| 34, Petrovskiy A, 2001      | Brisbane, Australia, 8 yr                                          | 5   | 13246  | Children + adults | TS |                  |      |      | 11.7 | 28.5  | 40.7  | 1 | Both       | long term trend, seasonality, temperature, humidity, day-of-week, influenza epidemic                    |
| Ko FWS38 2007               | Hong Kong, China, 6yr                                              | 5   | 69176  | General           | TS |                  | 52.5 | 36.4 | 18.8 | 53.2  | 43.4  | 1 | Both       | long term trend, seasonality, temperature, humidity, day-of-week, public holiday                        |
| 39, Kmpotic D, 2011         | Zagreb, Croatia, 3 yr                                              | 5   | 808    | Adults            | TS | 0.8              | 39.0 |      |      | 30.3  |       | 1 | Single     | long term trend, seasonality, temperature, humidity, day-of-week, influenza epidemic                    |
| 59, Romero-Placeres M, 2004 | Habana, Cuba, 2 yr                                                 | 5   | 44 029 | General           | TS |                  | 59.2 |      | 21.1 |       |       | 1 | Single     | long-term trend, seasonality, temperature, humidity, day-of-week, public holiday                        |
| 71, Morgan G, 2010          | Sydney, Australia, 8.5 yr                                          | 5   | 65448  | Children + adults | TS |                  | 62.0 |      |      |       |       | 1 | Single     | long-term trend, seasonality, temperature, humidity, day of week, influenza epidemic                    |
| 80, Fletcher T, 2000        | San Paulo, Brazil, 2 yr                                            | 4/5 | -      | Children          | TS | 5.8              | 64.9 |      | 18.3 | 174.3 | 63.4° | 1 | Single     | long-term trend, seasonality, temperature, humidity, day of week, holiday                               |
| 5, Son JY, 2013             | Seoul, Busan, Incheon, Daegu, Daejeon, Gwangju, Ulsan, Korea, 6 yr | 4   | -      | General           | TS | 1.0 <sup>a</sup> | 52.4 |      | 15.7 | 48.0  | 71.7  | 1 | Both       | long-term trend, seasonality, temperature, humidity, pressure, day-of-week                              |
| 8, Andersen ZJ, 2008        | Copenhagen, Denmark, 3yr                                           | 4   | -      | Children          | TS | 0.36             | 24.0 | 10.0 |      | 22.6  | 51.4  | 0 | Cumulative | long-term trends, seasonality, temperature, humidity, day-of-week, public holidays, influenza epidemics |
| 10, Kim SY, 2012            | Denver, US, 4 yr                                                   | 4   | 10,590 | General           | TS |                  |      | 8.0  |      |       |       | 1 | Single     | long-term trend, seasonality, temperature, humidity, day-of-week                                        |
| 12, Lee JT, 2002            | Seoul, Korea, 2 yr                                                 | 4   | 6436   | General           | TS | 2.3              | 64.0 |      | 22   | 64.7  | 77.1  | 1 | Cumulative | long-term trend, seasonality, temperature, and humidity, day-of-week                                    |
| 13, Delfino RJ, 1994        | Montreal, Canada, 4 yr                                             | 3   | 10385  | General           | TS |                  | 29.5 |      |      |       |       | 0 | Single     | long-term trend, seasonality, temperature, humidity, day-of-week                                        |

|                        |                                                                                                      |                  |       |                   |    |                  |       |       |      |       |       |                  |            |                                                                                                        |
|------------------------|------------------------------------------------------------------------------------------------------|------------------|-------|-------------------|----|------------------|-------|-------|------|-------|-------|------------------|------------|--------------------------------------------------------------------------------------------------------|
| 25, Ye F, 2001         | Tokyo, Japan, 15 yr                                                                                  | 3                | 2200  | Elderly           | TS |                  | 46.0  |       |      |       |       | 1                | Single     | long-term trends, seasonality, temperature                                                             |
| 36, Lee JT, 2006       | Seoul, Korea, 1 yr                                                                                   | 4                | 2952  | Children          | TS | 8.0 <sup>a</sup> | 135.2 |       | 25.0 | 156.2 | 63.9  | 1                | Single     | Long-term trend, seasonality, temperature, humidity, day-of-week,                                      |
| 40, Lin M, 2004        | Vancouver, BC, Canada, 12 yr                                                                         | 4                | 3754  | Children          | TS | 1.2              |       |       | 13.6 | 38.4  | 60.0° | 1                | Both       | long term trend, seasonality, temperature, humidity, day-of-week                                       |
| 45, Schouten JP, 1996  | Amsterdam, The Netherlands, 12 yr                                                                    | 4                | -     | General           | TS |                  |       |       | 28.0 | 50.0  | 69.0  | 0                | Both       | long-term trend, seasonality, temperature, humidity, day-of-week, public holiday, influenza epidemics  |
| 52, Silverman RA, 2010 | New York, US, 7 yr                                                                                   | 4                | 75383 | General           | TS |                  |       | 13. 0 |      |       | 87.9  | 1                | Cumulative | long-term trend, seasonality, temperature, humidity, day-of- week                                      |
| 65, Amancio CT, 2012   | San Paulo, Brazil, 2 yr                                                                              | 4                | 841   | Children          | TS |                  | 25.2  |       | 4.6  |       | 74.3  | 1                | Single     | long-term trend, seasonality, temperature, humidity, day-of-week                                       |
| 70, Sheppard L, 1999   | Seattle, Washington, 8 yr                                                                            | 3/4 <sup>b</sup> | 7837  | Children + adults | TS | 2.3              | 31.5  | 16.7  | 22.9 |       | 65.1  | 1/0 <sup>a</sup> | Single     | long-term trend, seasonality, temperature, humidity, day-of-week                                       |
| 75, Neidell M, 2010    | Southern California, 8 yr                                                                            | 4                | -     | General           | TS |                  |       |       |      |       | 175.7 | 1                | Cumulative | long-term trend, seasonality, temperature, humidity, day-of-week                                       |
| 81, Fung KY, 2005      | London, Ontario, Canada, 5 yr                                                                        | 4                | ?     | Children + adults | TS |                  | 38.0  |       |      |       |       | 1                | Both       | long-term trend, seasonality, temperature, humidity, day-of-week                                       |
| 83, Hua J, 2014        | Shanghai, China, 7 yr                                                                                | 4                |       | Children          | TS |                  |       | 34.0  |      |       |       | 1                | cumulative | long-term trend, seasonality, temperature, humidity                                                    |
| 9, Walters S, 1994     | Birmingham, UK, 2 yr                                                                                 | 2                | -     | General           | TS |                  |       |       | 39.1 |       |       | 1                | Cumulative | not declared                                                                                           |
| 35, Magas OK, 2007     | Oklahoma city metropolitan area, US, 3 yr                                                            | 1                | 1270  | Children          | TS |                  |       |       |      | -     |       | 0                | Single     | temperature, day-of-week, humidity, holiday                                                            |
| 53, Barnett AG, 2005   | Australia - Brisbane, Canberra, Melbourne, Perth, Sydney, New Zealand - Auckland, Christchurch, 3 yr | 5                | -     | Children          | CC | 1.1              | 17.6  | 9.4   | 7.0  | 17.6  | 49.6  | 1                | Cumulative | long-term trend, seasonality, temperature, humidity, day for the week, holiday and influenza epidemics |

|                      |                                 |   |        |          |    |      |      |      |      |      |       |   |            |                                                                   |
|----------------------|---------------------------------|---|--------|----------|----|------|------|------|------|------|-------|---|------------|-------------------------------------------------------------------|
| 17, Yang CY, 2007    | Taipei, 8 yr                    | 4 | 25602  | General  | CC | 1.7  | 49.0 |      | 12.3 | 63.0 | 44.0  | 1 | Cumulative | long-term trend, seasonality, temperature, humidity               |
| 18, Tsai SS, 2006    | Kaohsiung, 8 yr                 | 4 | 17682  | General  | CC | 1.00 | 76.7 |      | 27.1 | 55.9 | 56.3  | 1 | Cumulative | long-term trends, seasonality, temperature, humidity              |
| 37, Lin M, 2003      | Toronto, Ontario, Canada. 13 yr | 4 | 7319   | Children | CC | 1.5  |      |      | 15.3 | 51.8 | 65.1° | 1 | Both       | long term trend, seasonality, temperature, humidity, day-of-week, |
| 44, Lin M, 2002      | Toronto, Canada, 14 yr          | 4 | 7319   | Children | CC |      | 30.2 | 18.0 |      |      |       | 1 | Both       | long-term trend, seasonality, temperature, humidity, day-of-week  |
| 68, Iskandar A, 2012 | Copenhagen, Denmark, 8 yr       | 4 | 8226   | Children | CC |      | 26.2 | 10.3 |      | 23.3 |       | 1 | Cumulative | long-term trend, seasonality, temperature, humidity, day-of-week  |
| 85, Cheng MH, 2014   | Taipei, China, 5 yr             | 3 | 10,440 | General  | CC |      |      | 30.0 |      |      |       | 1 | Cumulative | long-term trend, seasonality, temperature, humidity               |
| 86, Cai J, 2014      | Shanghai, China, 7y r           | 4 | 15,678 | General  | TS |      | 88.0 |      | 45.0 | 60.0 |       | 1 | Both       | long-term trend, seasonality, temperature, humidity, day-of-week  |

| Study                                                                 | Location/Period                                          | Quality score | Sample size         | Population | Type of study | Pollutants and concentration |                  |                   |                 |                   |                | Measurement quality score (0-1 point) | Lag pattern (single day/ mean days) | Adjustments (long-term trend, seasonality, temperature, humidity, pressure, day for the week, holiday and influenza epidemics) |
|-----------------------------------------------------------------------|----------------------------------------------------------|---------------|---------------------|------------|---------------|------------------------------|------------------|-------------------|-----------------|-------------------|----------------|---------------------------------------|-------------------------------------|--------------------------------------------------------------------------------------------------------------------------------|
|                                                                       |                                                          |               |                     |            |               | CO                           | PM <sub>10</sub> | PM <sub>2.5</sub> | SO <sub>2</sub> | NO <sub>2</sub>   | O <sub>3</sub> |                                       |                                     |                                                                                                                                |
| Studies with both emergency room visit and hospital admission indices |                                                          |               |                     |            |               |                              |                  |                   |                 |                   |                |                                       |                                     |                                                                                                                                |
| 33, Chew FT, 1999                                                     | Singapore, 5 yr                                          | 4             | 6000(HA), 23000(ER) | Children   | TS            |                              |                  |                   | 38.1            | 18.9              |                | 1                                     | Single                              | long-term trend, seasonality, temperature, humidity, day-of-week                                                               |
| 62, Sluaghter JC, 2005                                                | Spokane, Washington DC, US, 7 yr                         | 4             | 2191/2373           | General    | TS            | 1.6 - 3.8                    | 7.9 - 41.9       | 4.2 - 20.2        |                 |                   |                | 1                                     | Single                              | long-term trend, seasonality, temperature, humidity, day-of-week                                                               |
| 26, Smargiassi A, 2009                                                | 0.5–7.5 km of the refinery stacks, Montreal Canada, 8 yr | 4             | 1579/263            | Children   | CC            |                              |                  |                   | 12.3            |                   |                | 1                                     | Both                                | long-term trends, seasonality, temperature, humidity, day-of-week                                                              |
| 63, Li S, 2001                                                        | Detroit, Michigan, 2 yr                                  | 4             | 7063                | Children   | CC            | 0.5                          |                  | 15.0              | 10.8            | 34.4 <sup>e</sup> |                | 1                                     | Both                                | long-term trend, seasonality, temperature, humidity, day-of-week                                                               |

### Supplemental Information, SI 3

#### Summary Statistics of Other Air Quality Components and Calculated p-values

(Note: Publ year=publication year; RR=relative risk; LCL=lower confidence limit; UCL=upper confidence limit; p-value calculated after Altman and Bland (2011)<sup>1</sup>; bold, italicized p-value <.05)

#### CO<sub>2</sub>

| Study 1st author  | Publ year | RR    | LCL   | UCL   | <i>p-value</i>         |
|-------------------|-----------|-------|-------|-------|------------------------|
| Thompson AJ       | 2001      | 1.025 | 1.000 | 1.055 | 0.0702351              |
| Fusco D           | 2001      | 1.005 | 0.975 | 1.038 | 0.7676324              |
| Szyszkowicz M     | 2008      | 1.076 | 1.032 | 1.120 | <b><i>0.000482</i></b> |
| Norris G          | 1999      | 1.133 | 1.027 | 1.253 | <b><i>0.013787</i></b> |
| Hajat S           | 1999      | 1.020 | 0.985 | 1.058 | 0.2811338              |
| Lee JT            | 2006      | 1.186 | 0.894 | 1.532 | 0.2162465              |
| Lin M             | 2003      | 1.080 | 1.000 | 1.176 | 0.0623584              |
| Lin M             | 2003      | 1.000 | 0.888 | 1.096 | 1                      |
| Krmpotic D        | 2011      | 1.218 | 1.026 | 1.436 | <b><i>0.021316</i></b> |
| Lin M (ML)        | 2004      | 1.096 | 0.984 | 1.226 | 0.1020115              |
| Lin M (MH)        | 2004      | 1.096 | 0.968 | 1.226 | 0.128406               |
| Lin M (FL)        | 2004      | 1.160 | 0.872 | 1.176 | 0.0513557              |
| Lin M (FH)        | 2004      | 1.080 | 0.904 | 1.256 | 0.3649995              |
| Abe T (A)         | 2007      | 1.163 | 0.960 | 1.409 | 0.122931               |
| Abe T (C)         | 2007      | 1.019 | 0.953 | 1.089 | 0.5922572              |
| Pereira G (M)     | 2010      | 2.215 | 1.243 | 3.465 | <b><i>0.002413</i></b> |
| Pereira G (F)     | 2010      | 1.382 | 0.451 | 2.424 | 0.4596406              |
| Jalaludin BB      | 2008      | 1.017 | 1.010 | 1.025 | <b><i>0.0001</i></b>   |
| Lavigne E         | 2012      | 1.000 | 0.720 | 1.280 | 1                      |
| Stieb DM          | 2009      | 0.997 | 0.974 | 1.021 | 0.8145069              |
| Sluaghter JC (E)  | 2005      | 1.000 | 0.960 | 1.048 | 1                      |
| Sluaghter JC (H)  | 2005      | 1.016 | 0.936 | 1.104 | 0.7193821              |
| Li S              | 2011      | 1.005 | 0.959 | 1.052 | 0.8436515              |
| Mar TF            | 2010      | 1.000 | 0.966 | 1.034 | 1                      |
| Sheppard L        | 1999      | 1.052 | 1.026 | 1.078 | <b><i>0.0001</i></b>   |
| Santus P          | 2012      | 1.030 | 0.938 | 1.132 | 0.5488283              |
| Fletcher T        | 2000      | 1.009 | 0.977 | 1.022 | 0.4438295              |
| Strickland MJ (W) | 2010      | 1.120 | 1.072 | 1.169 | <b><i>0.0001</i></b>   |
| Strickland MJ (C) | 2010      | 1.004 | 0.975 | 1.033 | 0.7987727              |
| Son JY            | 2013      | 1.003 | 0.957 | 1.048 | 0.905164               |
| Halonon JI        | 2008      | 0.927 | 0.820 | 1.035 | 0.2034389              |
| Halonon JI        | 2008      | 1.090 | 0.947 | 1.240 | 0.2118576              |
| Evans KA          | 2013      | 1.420 | 0.037 | 3.395 | 0.7736967              |



**CO2 (continued)**

| <b>Study 1st author</b> | <b>Publ year</b> | <b>RR</b> | <b>LCL</b> | <b>UCL</b> |  | <b><i>p-value</i></b>  |
|-------------------------|------------------|-----------|------------|------------|--|------------------------|
| Ito K                   | 2007             | 1.078     | 1.066      | 1.090      |  | <b><i>0.0001</i></b>   |
| Yang CY                 | 2007             | 1.417     | 1.270      | 1.578      |  | <b><i>0.0001</i></b>   |
| Yang CY                 | 2007             | 1.115     | 1.029      | 1.205      |  | <b><i>0.006901</i></b> |
| Tsai SS                 | 2006             | 1.612     | 1.380      | 1.860      |  | <b><i>0.0001</i></b>   |
| Tsai SS                 | 2006             | 2.140     | 1.826      | 2.479      |  | <b><i>0.0001</i></b>   |
| Barnett AG              | 2005             | 1.020     | 0.990      | 1.050      |  | 0.188257               |
| Andersen ZJ             | 2008             | 1.000     | 0.993      | 1.008      |  | 1                      |
| Lee JT                  | 2002             | 1.128     | 1.080      | 1.176      |  | <b><i>0.0001</i></b>   |
| Raun LH                 | 2014             | 1.155     | 1.000      | 1.258      |  | <b><i>0.013784</i></b> |

## NO2

| Study 1st author | Publ year | RR    | LCL   | UCL   | <i>p-value</i>  |
|------------------|-----------|-------|-------|-------|-----------------|
| Thompson AJ      | 2001      | 1.039 | 1.015 | 1.063 | <b>0.001219</b> |
| Samoli E         | 2010      | 1.011 | 0.990 | 1.029 | 0.2702846       |
| Fusco D          | 2001      | 1.021 | 0.998 | 1.043 | 0.0643187       |
| Morgan G (C)     | 1998      | 1.009 | 0.995 | 1.024 | 0.2235095       |
| Morgan G (A)     | 1998      | 1.007 | 0.991 | 1.022 | 0.3812297       |
| Laurent O        | 2008      | 1.025 | 0.990 | 1.062 | 0.1687421       |
| Anderson HR      | 1998      | 1.006 | 1.002 | 1.010 | <b>0.003242</b> |
| Szyszkowicz M    | 2008      | 1.020 | 1.008 | 1.032 | <b>0.001015</b> |
| Lee SL           | 2006      | 1.016 | 1.009 | 1.023 | <b>0.0001</b>   |
| Norris G         | 1999      | 1.020 | 0.996 | 1.049 | 0.134508        |
| Hajat S          | 1999      | 1.004 | 0.999 | 1.010 | 0.1534962       |
| Tenias JM        | 1998      | 1.076 | 1.020 | 1.134 | <b>0.006746</b> |
| Chew FT          | 1999      | 1.006 | 0.945 | 1.011 | 0.7413803       |
| Magas OK         | 2007      | 1.133 | 1.047 | 1.227 | <b>0.002086</b> |
| Lee JT           | 2006      | 1.018 | 1.006 | 1.033 | <b>0.008283</b> |
| Lin M (M)        | 2003      | 1.018 | 0.996 | 1.044 | 0.1375644       |
| Lin M (F)        | 2003      | 0.996 | 0.965 | 1.027 | 0.8126995       |
| Ko FWS           | 2007      | 1.009 | 1.005 | 1.014 | <b>0.0001</b>   |
| Krmpotic D       | 2011      | 1.058 | 1.006 | 1.110 | <b>0.02447</b>  |
| Lin M (ML)       | 2004      | 1.097 | 1.030 | 1.172 | <b>0.004995</b> |
| Lin M (MH)       | 2004      | 1.030 | 0.963 | 1.105 | 0.4068878       |
| Lin M (FL)       | 2004      | 1.052 | 0.970 | 1.142 | 0.2255329       |
| Lin M (FH)       | 2004      | 1.007 | 0.925 | 1.097 | 0.8819162       |
| Galan I          | 2003      | 1.013 | 0.991 | 1.035 | 0.2464135       |
| Schouten JP      | 1996      | 1.006 | 0.989 | 1.027 | 0.5450544       |
| Boutin-Forzano S | 2004      | 1.007 | 0.996 | 1.018 | 0.2124552       |
| Pereira G (M)    | 2010      | 1.779 | 1.049 | 2.558 | <b>0.011266</b> |
| Pereira G (F)    | 2010      | 1.195 | 0.562 | 1.925 | 0.582443        |
| Jalaludin BB     | 2008      | 1.012 | 1.007 | 1.016 | <b>0.0001</b>   |
| Jaffe DH         | 2003      | 1.015 | 0.995 | 1.034 | 0.1291189       |
| Lavigne E        | 2012      | 0.989 | 0.923 | 1.054 | 0.7568099       |
| Stieb DM         | 2009      | 0.999 | 0.988 | 1.010 | 0.8685931       |
| Li S             | 2011      | 1.019 | 1.003 | 1.036 | <b>0.022479</b> |
| Cirera L         | 2012      | 1.026 | 1.004 | 1.049 | <b>0.021576</b> |
| Yamazaki S (W)   | 2013      | 1.054 | 0.784 | 1.591 | 0.7833535       |
| Yamazaki S (C)   | 2013      | 0.939 | 0.809 | 1.126 | 0.4645442       |
| Santus P         | 2012      | 0.968 | 0.954 | 0.981 | <b>0.0001</b>   |
| Fletcher T       | 2000      | 1.003 | 0.998 | 1.009 | 0.287819        |
| Son JY           | 2013      | 1.009 | 1.001 | 1.016 | <b>0.018085</b> |
| Halonen JI (A)   | 2008      | 1.015 | 0.983 | 1.048 | 0.3681822       |
| Halonen JI (O)   | 2008      | 1.026 | 0.983 | 1.073 | 0.2535308       |

**NO2 (continued)**

| <b>Study 1st author</b> | <b>Publ year</b> | <b>RR</b> | <b>LCL</b> | <b>UCL</b> | <b><i>p-value</i></b>  |
|-------------------------|------------------|-----------|------------|------------|------------------------|
| Sunyer J (A)            | 1997             | 1.006     | 1.001      | 1.011      | <b><i>0.018198</i></b> |
| Sunyer J (C)            | 1997             | 1.005     | 1.001      | 1.010      | <b><i>0.028699</i></b> |
| Mehta AJ                | 2012             | 1.019     | 0.849      | 1.223      | 0.8504996              |
| Ito K                   | 2007             | 1.024     | 1.015      | 1.032      | <b><i>0.0001</i></b>   |
| Cassino C               | 1999             | 0.990     | 0.951      | 1.029      | 0.6298615              |
| Chardon B               | 2007             | 0.997     | 0.967      | 1.027      | 0.8553863              |
| Yang CY (W)             | 2007             | 1.086     | 1.055      | 1.120      | <b><i>0.0001</i></b>   |
| Yang CY (C)             | 2007             | 1.062     | 1.037      | 1.088      | <b><i>0.0001</i></b>   |
| Tsai SS (W)             | 2006             | 1.074     | 1.032      | 1.122      | <b><i>0.000859</i></b> |
| Tsai SS (C)             | 2006             | 1.321     | 1.251      | 1.399      | <b><i>0.0001</i></b>   |
| Wong TW                 | 1999             | 1.026     | 1.010      | 1.042      | <b><i>0.001305</i></b> |
| Petroeschovsky A        | 2001             | 0.998     | 0.997      | 0.999      | <b><i>0.000102</i></b> |
| Jazbec A (C)            | 1999             | 1.137     | 1.005      | 1.287      | <b><i>0.041512</i></b> |
| Jazbec A (A)            | 1999             | 1.098     | 1.002      | 1.203      | <b><i>0.044647</i></b> |
| Castellsague J (W)      | 1995             | 1.018     | 1.004      | 1.032      | <b><i>0.010979</i></b> |
| Castellsague J (C)      | 1995             | 1.022     | 1.004      | 1.042      | <b><i>0.021497</i></b> |
| Barnett AG              | 2005             | 1.023     | 0.992      | 1.054      | 0.1417651              |
| Barnett AG              | 2005             | 1.055     | 1.016      | 1.096      | <b><i>0.005655</i></b> |
| Medina S                | 1997             | 1.041     | 1.026      | 1.053      | <b><i>0.0001</i></b>   |
| Iskandar A              | 2012             | 1.075     | 1.030      | 1.119      | <b><i>0.000662</i></b> |
| Strickland MJ           | 2010             | 1.014     | 1.007      | 1.021      | <b><i>0.0001</i></b>   |
| Andersen ZJ             | 2008             | 1.032     | 0.935      | 1.146      | 0.5553011              |
| Lee JT                  | 2002             | 1.050     | 1.033      | 1.067      | <b><i>0.0001</i></b>   |
| Cai J                   | 2014             | 1.011     | 1.005      | 1.016      | <b><i>0.0001</i></b>   |
| Raun LH                 | 2014             | 1.073     | 1.042      | 1.104      | <b><i>0.0001</i></b>   |

### O3

| Study 1st author   | Publ year | RR    | LCL   | UCL   | <i>p-value</i>  |
|--------------------|-----------|-------|-------|-------|-----------------|
| Thompson AJ        | 2001      | 0.977 | 0.953 | 1.005 | 0.0856757       |
| Samoli E           | 2010      | 0.969 | 0.934 | 1.005 | 0.091725        |
| Fusco D            | 2001      | 1.016 | 0.987 | 1.046 | 0.2875781       |
| Anderson HR        | 1998      | 1.003 | 1.000 | 1.005 | <b>0.018427</b> |
| Szyszkowicz M      | 2008      | 1.028 | 1.013 | 1.043 | <b>0.000229</b> |
| Lee SL             | 2006      | 1.010 | 1.002 | 1.019 | <b>0.020273</b> |
| Hajat S            | 1999      | 0.997 | 0.990 | 1.004 | 0.4090144       |
| Tenias JM          | 1998      | 1.063 | 1.014 | 1.114 | <b>0.010857</b> |
| Stieb DM           | 1996      | 1.036 | 1.017 | 1.055 | <b>0.000175</b> |
| Lee JT             | 2006      | 1.025 | 1.005 | 1.027 | <b>0.0001</b>   |
| Galan I            | 2003      | 1.039 | 1.010 | 1.068 | <b>0.007249</b> |
| Mohr LB (W)        | 2008      | 0.981 | 0.953 | 1.014 | 0.2276172       |
| Mohr LB (C)        | 2008      | 1.023 | 0.986 | 1.065 | 0.2501553       |
| Boutin-Forzano S   | 2004      | 1.006 | 1.000 | 1.016 | 0.1398602       |
| Medina S           | 1997      | 1.012 | 0.995 | 1.033 | 0.2139423       |
| Jaffe DH           | 2003      | 1.014 | 1.000 | 1.028 | <b>0.048062</b> |
| Lavigne E          | 2012      | 1.042 | 1.004 | 1.081 | <b>0.028827</b> |
| Stieb DM           | 2009      | 1.000 | 0.990 | 1.011 | 1               |
| Wilson AM (P)      | 2004      | 1.020 | 1.000 | 1.030 | <b>0.008634</b> |
| Wilson AM (M)      | 2004      | 0.990 | 0.980 | 1.010 | 0.1926288       |
| Amancio CT         | 2012      | 1.000 | 1.000 | 1.001 | 1               |
| Cirera L           | 2012      | 0.971 | 0.938 | 1.006 | 0.099055        |
| Sheppard L         | 1999      | 1.014 | 1.005 | 1.026 | <b>0.008407</b> |
| Yamazaki S (W)     | 2013      | 1.054 | 0.970 | 1.154 | 0.2376168       |
| Yamazaki S (C)     | 2013      | 0.956 | 0.860 | 1.080 | 0.4472306       |
| Babin S            | 2008      | 1.004 | 1.001 | 1.008 | <b>0.024531</b> |
| Mar TF             | 2009      | 1.047 | 1.005 | 1.089 | <b>0.024703</b> |
| Hernandez-Cadena L | 2000      | 1.004 | 0.997 | 1.012 | 0.2987379       |
| Fletcher T         | 2000      | 1.000 | 0.991 | 1.011 | 1               |
| Morgan G (C)       | 1998      | 0.997 | 0.992 | 1.002 | 0.242804        |
| Morgan G (A)       | 1998      | 1.003 | 0.997 | 1.010 | 0.3709557       |
| Sunyer J (A)       | 1997      | 1.003 | 0.987 | 1.040 | 0.8336614       |
| Sunyer J (C)       | 1997      | 0.998 | 0.988 | 1.008 | 0.7085282       |
| Yamazaki S         | 2009      | 1.009 | 1.005 | 1.110 | 0.7368412       |
| Chakraborty P      | 2013      | 0.998 | 0.996 | 0.999 | <b>0.009064</b> |
| Evans KA           | 2013      | 0.957 | 0.887 | 1.154 | 0.5232048       |
| Ito K              | 2007      | 1.011 | 0.999 | 1.014 | <b>0.004056</b> |
| Yang CY (W)        | 2007      | 1.012 | 0.986 | 1.039 | 0.3782693       |
| Yang CY (C)        | 2007      | 1.073 | 1.046 | 1.104 | <b>0.0001</b>   |
| Tsai SS (W)        | 2006      | 1.067 | 1.046 | 1.089 | <b>0.0001</b>   |
| Tsai SS (C)        | 2006      | 1.047 | 1.017 | 1.081 | <b>0.003229</b> |

### O3 (continued)

| Study 1st author   | Publ year | RR    | LCL   | UCL   | <i>p-value</i>  |
|--------------------|-----------|-------|-------|-------|-----------------|
| Wong TW            | 1999      | 1.031 | 1.017 | 1.460 | 0.753609        |
| Laurent O          | 2008      | 0.998 | 0.965 | 1.032 | 0.914377        |
| Petroeschevsky A   | 2001      | 1.004 | 1.002 | 1.007 | <b>0.00172</b>  |
| Lin M(M)           | 2003      | 0.975 | 0.925 | 1.025 | 0.3389074       |
| Lin M(F)           | 2003      | 0.913 | 0.863 | 1.025 | <b>0.037762</b> |
| Lin M(ML)          | 2004      | 0.964 | 0.943 | 0.986 | <b>0.001316</b> |
| Lin M(MH)          | 2004      | 0.983 | 0.960 | 1.095 | 0.6219986       |
| Lin M(FL)          | 2004      | 1.026 | 0.993 | 1.066 | 0.1566245       |
| Lin M(FH)          | 2004      | 0.979 | 0.948 | 1.012 | 0.2043825       |
| Ko FWS             | 2007      | 1.010 | 1.006 | 1.014 | <b>0.0001</b>   |
| Schouten JP        | 1996      | 1.009 | 0.993 | 1.027 | 0.3009679       |
| Castellsague J (W) | 1995      | 0.996 | 0.976 | 1.018 | 0.7223679       |
| Castellsague J (C) | 1995      | 1.022 | 0.999 | 1.046 | 0.0631237       |
| Silverman RA       | 2010      | 1.019 | 1.013 | 1.025 | <b>0.0001</b>   |
| Barnett AG         | 2005      | 0.990 | 0.953 | 1.031 | 0.6291404       |
| Barnett AG         | 2005      | 0.980 | 0.940 | 1.025 | 0.3663807       |
| Jalaludin BB       | 2008      | 1.003 | 1.001 | 1.005 | <b>0.003287</b> |
| Cassino C          | 1999      | 1.087 | 1.033 | 1.146 | <b>0.001684</b> |
| Neidell M          | 2010      | 1.013 | 1.010 | 1.016 | <b>0.0001</b>   |
| Santus P           | 2012      | 1.010 | 0.991 | 1.052 | 0.5243647       |
| Yamazaki S         | 2009      | 1.073 | 1.000 | 1.151 | <b>0.049155</b> |
| Strickland MJ      | 2010      | 1.010 | 1.005 | 1.015 | <b>0.000093</b> |
| Son JY             | 2013      | 1.004 | 0.999 | 1.009 | 0.1160943       |
| Paulu C            | 2008      | 1.009 | 1.000 | 1.023 | 0.1224737       |
| Andersen ZJ        | 2008      | 1.043 | 0.914 | 1.226 | 0.5860823       |
| Evans KA           | 2013      | 0.911 | 0.793 | 1.121 | 0.2951183       |
| Lee JT             | 2002      | 1.026 | 1.015 | 1.034 | <b>0.0001</b>   |
| Gleason JA         | 2014      | 1.032 | 1.026 | 1.037 | <b>0.0001</b>   |
| Raun LH            | 2014      | 1.009 | 1.002 | 1.016 | <b>0.011329</b> |
| Sacks JD           | 2014      | 1.004 | 1.000 | 1.009 | 0.0803567       |

# PM10

| Study 1st author   | Publ year | RR    | LCL   | UCL   | <i>p-value</i>  |
|--------------------|-----------|-------|-------|-------|-----------------|
| Thompson AJ        | 2001      | 1.009 | 1.000 | 1.019 | 0.0616359       |
| Samoli E           | 2010      | 1.025 | 1.001 | 1.051 | <b>0.046683</b> |
| Szyszkowicz M      | 2008      | 1.018 | 1.001 | 1.036 | 0.0415255       |
| Lee SL             | 2006      | 1.017 | 1.011 | 1.023 | <b>0.0001</b>   |
| Norris G           | 1999      | 1.121 | 1.043 | 1.198 | <b>0.001279</b> |
| Lee JT             | 2006      | 1.016 | 1.008 | 1.023 | <b>0.0001</b>   |
| Ko FWS             | 2007      | 1.005 | 1.002 | 1.009 | <b>0.005019</b> |
| Krmpotic D         | 2011      | 0.989 | 0.942 | 1.044 | 0.6863417       |
| Galan I            | 2003      | 1.006 | 0.976 | 1.037 | 0.7120714       |
| Atkinson RW (C)    | 2001      | 1.012 | 1.002 | 1.023 | <b>0.023976</b> |
| Atkinson RW (A)    | 2001      | 1.011 | 1.003 | 1.018 | <b>0.003914</b> |
| Jalaludin BB       | 2008      | 1.014 | 1.008 | 1.022 | <b>0.0001</b>   |
| Jaffe DH           | 2003      | 1.010 | 0.986 | 1.038 | 0.4566827       |
| Stieb DM           | 2009      | 1.004 | 0.950 | 1.015 | 0.8246528       |
| Romero-Placeres M  | 2004      | 0.998 | 0.943 | 1.003 | 0.9066903       |
| Chimonas MAR       | 2007      | 1.006 | 1.001 | 1.013 | <b>0.048715</b> |
| Sluaghter JC (ER)  | 2005      | 1.012 | 0.992 | 1.028 | 0.1908417       |
| Sluaghter JC (H)   | 2005      | 1.012 | 0.980 | 1.048 | 0.4956615       |
| Amancio CT         | 2012      | 1.006 | 0.999 | 1.013 | 0.0916967       |
| Sheppard L         | 1999      | 1.025 | 1.010 | 1.040 | <b>0.000987</b> |
| Morgan G (C)       | 2010      | 1.006 | 0.976 | 1.038 | 0.7165524       |
| Morgan G (A)       | 2010      | 1.025 | 0.993 | 1.058 | 0.126933        |
| Yamazaki S (W)     | 2013      | 0.968 | 0.818 | 1.146 | 0.7185001       |
| Yamazaki S (C)     | 2013      | 1.022 | 0.902 | 1.158 | 0.7457867       |
| Santus P           | 2012      | 1.005 | 0.987 | 1.024 | 0.6075507       |
| Babin S            | 2008      | 0.990 | 0.960 | 1.010 | 0.4462646       |
| Hernandez-Cadena L | 2000      | 1.013 | 0.993 | 1.033 | 0.2012836       |
| Fletcher T         | 2000      | 1.005 | 0.992 | 1.020 | 0.4922045       |
| Son JY             | 2013      | 1.005 | 1.001 | 1.008 | <b>0.005062</b> |
| Delfino RJ         | 1994      | 1.021 | 1.006 | 1.040 | <b>0.014173</b> |
| Ye F               | 2001      | 1.003 | 1.001 | 1.004 | <b>0.0001</b>   |
| Morgan G (C)       | 1998      | 0.997 | 0.984 | 1.011 | 0.6765743       |
| Morgan G (A)       | 1998      | 1.005 | 0.992 | 1.018 | 0.4586868       |
| Malig BJ           | 2013      | 1.022 | 1.003 | 1.031 | <b>0.002</b>    |
| Chakraborty P      | 2013      | 1.000 | 1.000 | 1.003 | 1               |
| Fung KY            | 2005      | 1.096 | 1.011 | 1.201 | <b>0.036618</b> |
| Chardon B          | 2007      | 1.025 | 0.983 | 1.068 | 0.2457323       |
| Yang CY (W)        | 2007      | 1.017 | 0.989 | 1.048 | 0.2570002       |
| Yang CY (C)        | 2007      | 1.018 | 1.004 | 1.033 | <b>0.013982</b> |
| Tsai SS            | 2006      | 1.048 | 1.025 | 1.075 | <b>0.000128</b> |
| Wong TW            | 1999      | 1.015 | 1.002 | 1.028 | <b>0.022532</b> |

**PM10 (continued)**

| <b>Study 1st author</b> | <b>Publ year</b> | <b>RR</b> | <b>LCL</b> | <b>UCL</b> | <b><i>p-value</i></b> |
|-------------------------|------------------|-----------|------------|------------|-----------------------|
| Laurent O               | 2008             | 1.035     | 0.997      | 1.075      | 0.073024              |
| Lin M                   | 2002             | 1.033     | 0.966      | 1.115      | 0.3815059             |
| Barnett AG (0-4y)       | 2005             | 1.023     | 1.007      | 1.039      | <b>0.004424</b>       |
| Barnett AG (4-14y)      | 2005             | 1.025     | 1.001      | 1.051      | <b>0.046683</b>       |
| Iskandar A              | 2012             | 1.052     | 1.022      | 1.090      | <b>0.00209</b>        |
| Andersen ZJ             | 2008             | 1.015     | 0.946      | 1.092      | 0.6974281             |
| Strickland MJ           | 2010             | 1.014     | 1.002      | 1.026      | <b>0.021146</b>       |
| Lee JT                  | 2002             | 1.012     | 1.009      | 1.027      | <b>0.008187</b>       |
| Cadelis G               | 2014             | 1.010     | 0.941      | 1.046      | 0.7254741             |
| Cai J                   | 2014             | 1.001     | 0.998      | 1.005      | 0.5870548             |

## SO2

| Study 1st author  | Publ year | RR    | LCL   | UCL   | <i>p-value</i>  |
|-------------------|-----------|-------|-------|-------|-----------------|
| Thompson AJ       | 2001      | 1.007 | 1.003 | 1.011 | <b>0.000614</b> |
| Wong TW           | 1999      | 1.017 | 0.998 | 1.036 | 0.0766384       |
| Fusco D           | 2001      | 0.978 | 0.904 | 1.057 | 0.5890392       |
| Anderson HR       | 1998      | 1.016 | 1.005 | 1.028 | 0.0059914       |
| Hajat S           | 1999      | 1.018 | 1.001 | 1.034 | 0.0308161       |
| Petroeshevsky A   | 2001      | 0.998 | 0.996 | 1.000 | <b>0.049846</b> |
| Ko FWS            | 2007      | 1.004 | 0.998 | 1.011 | 0.2287405       |
| Galan I           | 2003      | 1.018 | 0.984 | 1.054 | 0.3133554       |
| Schouten JP       | 1996      | 0.980 | 0.970 | 0.992 | <b>0.000444</b> |
| Medina S          | 1997      | 1.026 | 1.010 | 1.041 | <b>0.000917</b> |
| Lavigne E         | 2012      | 1.044 | 0.933 | 1.133 | 0.3916664       |
| Stieb DM          | 2009      | 0.992 | 0.980 | 1.005 | 0.2130706       |
| Romero-Placeres M | 2004      | 0.994 | 0.983 | 1.004 | 0.2675815       |
| Wilson AM (P)     | 2004      | 1.040 | 1.000 | 1.070 | <b>0.022883</b> |
| Wilson AM (M)     | 2004      | 1.020 | 0.990 | 1.060 | 0.2587899       |
| Cirera L          | 2012      | 1.060 | 1.014 | 1.110 | <b>0.011528</b> |
| Romieu I          | 1995      | 1.003 | 0.999 | 1.008 | 0.1916958       |
| Santus P          | 2012      | 0.950 | 0.808 | 1.104 | 0.5301991       |
| Son JY            | 2013      | 1.002 | 0.983 | 1.023 | 0.8548452       |
| Sunyer J          | 1997      | 0.999 | 0.992 | 1.007 | 0.8059108       |
| Samoli E          | 2010      | 1.060 | 1.009 | 1.113 | <b>0.019747</b> |
| Lee SL            | 2006      | 0.989 | 0.974 | 0.998 | 0.0744936       |
| Norris G          | 1999      | 1.006 | 0.985 | 1.026 | 0.5770494       |
| Tenias JM         | 1998      | 1.050 | 0.973 | 1.133 | 0.2107013       |
| Stieb DM          | 1996      | 0.997 | 0.992 | 1.006 | 0.4080414       |
| Chew FT           | 1999      | 1.015 | 1.007 | 1.023 | <b>0.000235</b> |
| Lee JT            | 2006      | 1.077 | 1.000 | 1.161 | 0.0510455       |
| Lin M (M)         | 2003      | 1.000 | 0.975 | 1.025 | 1               |
| Lin M (F)         | 2003      | 1.020 | 0.985 | 1.055 | 0.2611838       |
| Lin M (ML)        | 2004      | 1.021 | 0.934 | 1.106 | 0.6426132       |
| Lin M (MH)        | 2004      | 1.032 | 0.947 | 1.127 | 0.4876276       |
| Lin M (FL)        | 2004      | 1.053 | 0.947 | 1.170 | 0.3438004       |
| Lin M (FH)        | 2004      | 1.074 | 0.958 | 1.201 | 0.2175988       |
| Mohr LB (W)       | 2008      | 0.996 | 0.975 | 1.018 | 0.7289469       |
| Mohr LB (C)       | 2008      | 1.011 | 0.985 | 1.035 | 0.3933581       |
| Abe T (A)         | 2007      | 1.008 | 0.930 | 1.092 | 0.8562393       |
| Abe T (C)         | 2007      | 0.996 | 0.977 | 1.024 | 0.751056        |
| Boutin-Forzano S  | 2004      | 1.002 | 0.995 | 1.010 | 0.6130637       |
| Jalaludin BB      | 2008      | 1.070 | 1.031 | 1.105 | <b>0.000146</b> |
| Jaffe DH          | 2003      | 1.024 | 1.002 | 1.046 | <b>0.03026</b>  |
| Li S              | 2011      | 1.027 | 1.007 | 1.048 | <b>0.008869</b> |



## SO2 (continued)

| Study 1st author   | Publ year | RR    | LCL   | UCL   | <i>p-value</i>  |
|--------------------|-----------|-------|-------|-------|-----------------|
| Amancio CT         | 2012      | 1.027 | 1.002 | 1.053 | <b>0.03511</b>  |
| Sheppard L         | 1999      | 1.014 | 0.986 | 1.028 | 0.1926567       |
| Fletcher T         | 2000      | 1.039 | 0.993 | 1.091 | 0.1109411       |
| Sunyer J (C)       | 2003      | 1.013 | 1.004 | 1.022 | <b>0.004425</b> |
| Sunyer J (A)       | 2003      | 1.000 | 0.991 | 1.010 | 1               |
| Smargiassi A (H)   | 2009      | 1.169 | 1.000 | 1.360 | <b>0.046151</b> |
| Smargiassi A (E)   | 2009      | 1.048 | 0.976 | 1.121 | 0.185688        |
| Evans KA           | 2013      | 1.090 | 0.887 | 1.350 | 0.4292189       |
| Ito K              | 2007      | 1.033 | 1.030 | 1.043 | <b>0.0001</b>   |
| Cassino C          | 1999      | 0.977 | 0.938 | 1.019 | 0.2741459       |
| Yang CY (W)        | 2007      | 1.091 | 1.001 | 1.187 | <b>0.044792</b> |
| Yang CY (C)        | 2007      | 0.978 | 0.920 | 1.038 | 0.4793457       |
| Tsai SS (W)        | 2006      | 1.011 | 0.973 | 1.050 | 0.5853068       |
| Tsai SS (C)        | 2006      | 1.113 | 1.044 | 1.190 | <b>0.001395</b> |
| Laurent O          | 2008      | 1.056 | 0.979 | 1.139 | 0.1588227       |
| Castellsague J (W) | 1995      | 1.021 | 0.992 | 1.052 | 0.1660837       |
| Castellsague J (C) | 1995      | 1.008 | 0.984 | 1.034 | 0.5395251       |
| Barnett AG         | 2005      | 1.017 | 1.004 | 1.031 | <b>0.012717</b> |
| Barnett AG         | 2005      | 1.013 | 0.964 | 1.084 | 0.6791539       |
| Strickland MJ      | 2010      | 1.004 | 0.998 | 1.009 | 0.1539128       |
| Walters S (W)      | 1994      | 1.012 | 0.987 | 1.448 | 0.9105847       |
| Walters S (C)      | 1994      | 1.037 | 1.000 | 1.076 | 0.051474        |
| Cai J              | 2014      | 1.013 | 1.005 | 1.021 | <b>0.001398</b> |
| Raun LH            | 2014      | 1.150 | 0.850 | 1.400 | 0.275625        |

## Source:

- Altman DG, Bland JM. 2011. How to obtain the p-value from a confidence interval. BMJ. 343:d2304. <https://doi.org/10.1136/bmj.d2304>.

## Supplemental Information, SI 4

### P-value Plots and Summary Statistics of Datasets from Meta-analysis of

#### Selected Cancers in Petroleum Refinery Workers after Schnatter et al. (2018)

p-Value plots for meta-analysis of observational datasets representing: (i) petroleum refinery worker–chronic myeloid leukemia risk and (ii) petroleum refinery worker–mesothelioma risk after Schnatter et al. (2018):<sup>1</sup>

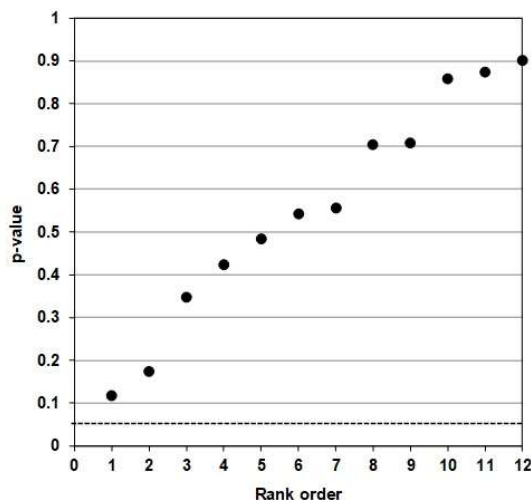

(i) petroleum refinery  
worker–chronic myeloid  
leukemia risk (n=12)

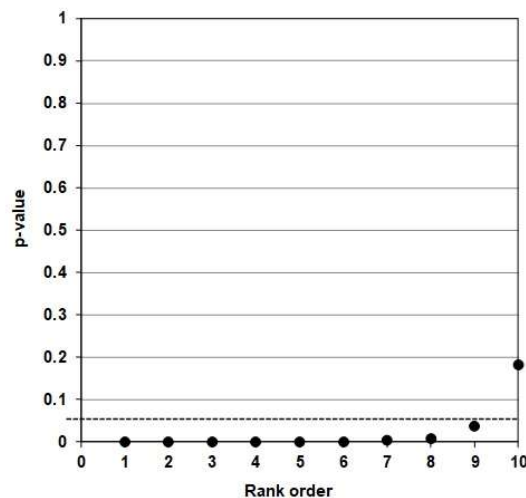

(ii) petroleum refinery  
worker– mesothelioma risk  
(n=10)

(Note below: Base study=base study 1<sup>st</sup> author name in Schnatter et al. (2018)<sup>1</sup>; RR=relative risk; LCL=lower confidence limit; UCL=upper confidence limit; p-value calculated after Altman and Bland (2011)<sup>2</sup>; bold, italicized p-value < .05)

Summary statistics for chronic myeloid leukemia risk for petroleum refinery workers:

| Base study           | RR   | LCL  | UCL  | p-value |
|----------------------|------|------|------|---------|
| Collingwood 1996     | 0.53 | 0.07 | 3.74 | 0.54263 |
| Divine 1999a         | 1.05 | 0.60 | 1.85 | 0.87478 |
| Gun 2006b            | 1.09 | 0.45 | 2.61 | 0.85800 |
| Huebner 2004         | 1.68 | 0.88 | 3.23 | 0.11778 |
| Lewis 2000a          | 1.08 | 0.35 | 3.35 | 0.90196 |
| Rushton 1993a        | 0.89 | 0.50 | 1.61 | 0.70923 |
| Satin 1996           | 0.85 | 0.38 | 1.88 | 0.70346 |
| Satin 2002           | 0.45 | 0.14 | 1.39 | 0.17355 |
| Tsai 2007            | 0.66 | 0.21 | 2.05 | 0.48425 |
| Wong 2001a           | 1.31 | 0.55 | 3.15 | 0.55549 |
| Wong 2001b           | 1.96 | 0.49 | 7.84 | 0.34689 |
| Wongsrichanalai 1989 | 0.44 | 0.06 | 3.12 | 0.42318 |

Summary statistics for mesothelioma risk for petroleum refinery workers (based on mesothelioma subgroup analysis using Schnatter et al. (2018)<sup>1</sup> ‘Best Methods’ dataset):

| <b>Base study</b> | <b>RR</b> | <b>LCL</b> | <b>UCL</b> | <b>p-value</b> |
|-------------------|-----------|------------|------------|----------------|
| Devine 1999a      | 2.97      | 2.21       | 3.99       | <b>0.0001</b>  |
| Gamble 2000       | 2.43      | 1.35       | 4.39       | <b>0.00321</b> |
| Gun 2006a         | 3.77      | 2.14       | 6.64       | <b>0.0001</b>  |
| Honda 1995        | 2.00      | 1.04       | 3.84       | <b>0.03720</b> |
| Hornstra 1993     | 5.51      | 3.38       | 8.99       | <b>0.0001</b>  |
| Huebner 2009      | 2.44      | 1.83       | 3.24       | <b>0.0001</b>  |
| Kaplan 1986       | 2.41      | 1.26       | 4.64       | <b>0.00817</b> |
| Lewis 2000a       | 8.68      | 5.77       | 13.06      | <b>0.0001</b>  |
| Tsai 2003         | 2.16      | 0.70       | 6.69       | 0.18215        |
| Tsai 2007         | 2.50      | 1.63       | 3.83       | <b>0.0001</b>  |

**Sources:**

- 1 Schnatter AR, Chen M, DeVilbiss EA, Lewis RJ, Gallagher EM. 2018. Systematic review and meta-analysis of selected cancers in petroleum refinery workers. J Occup Environ Med. 60(7):e329–e342. <https://doi.org/10.1097/JOM.0000000000001336>.
- 2 Altman DG, Bland JM. 2011. How to obtain the p-value from a confidence interval. BMJ. 343:d2304. <https://doi.org/10.1136/bmj.d2304>.

## Supplemental Information, SI 5

### **P-value Plot and Summary Statistics of Datasets from Meta-analysis of Elderly Long-term Exercise Training–Mortality & Morbidity Risk after de Souto Barreto et al. (2019)**

p-Value plot for meta-analysis of observational datasets representing elderly long-term exercise training–mortality & morbidity risk after de Souto Barreto et al. (2019)<sup>1</sup>;

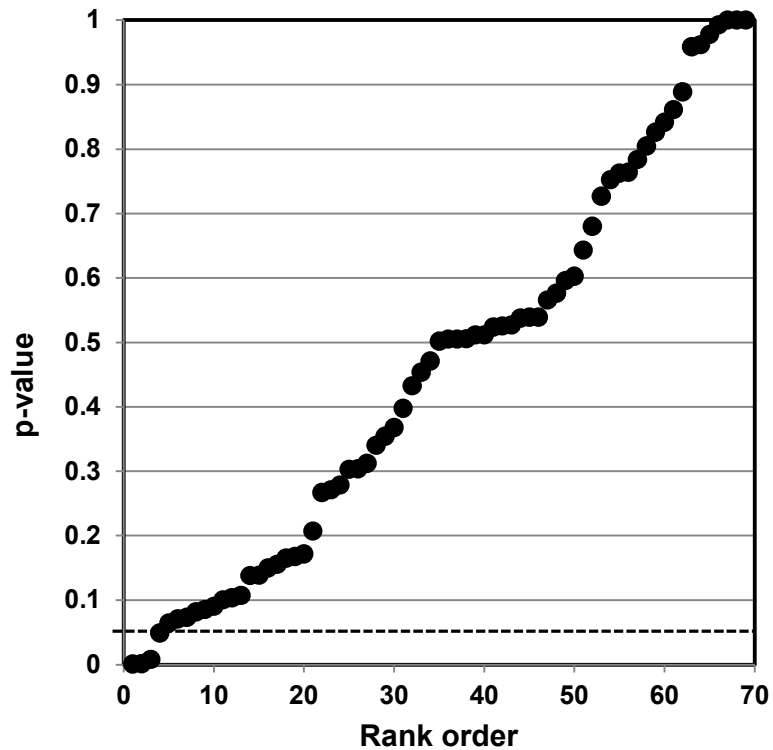

(Note below: Base study=base study 1<sup>st</sup> author name in de Souto Barreto et al. (2019)<sup>1</sup>; RR=relative risk; LCL=lower confidence limit; UCL=upper confidence limit; p-value calculated after Altman and Bland (2011)<sup>2</sup>; bold, italicized p-value <.05)

Summary statistics for observational datasets representing elderly long-term exercise training–mortality & morbidity risk:

| <b>Outcome</b> | <b>No.</b> | <b>Base Study ID (n=69)</b>        | <b>RR</b> | <b>LCL</b> | <b>UCL</b> | <b><i>p-value</i></b> |
|----------------|------------|------------------------------------|-----------|------------|------------|-----------------------|
| Mortality      | 1          | Belardinelli et al. 2012           | 0.38      | 0.13       | 1.15       | 0.08153               |
|                | 2          | Barnett et al. 2003                | 0.14      | 0.01       | 2.63       | 0.16736               |
|                | 3          | O'Connor et al. 2009               | 0.96      | 0.80       | 1.16       | 0.67980               |
|                | 4          | Campbell et al. 1997               | 0.50      | 0.09       | 2.70       | 0.43245               |
|                | 5          | El-Khoury et al. 2015              | 0.84      | 0.26       | 2.72       | 0.78350               |
|                | 6          | Galvão et al. 2014                 | 3.00      | 0.13       | 71.92      | 0.50544               |
|                | 7          | Gianoudis et al. 2014              | 1.00      | 0.06       | 15.72      | 1.00000               |
|                | 8          | Hewitt et al. 2018                 | 1.02      | 0.52       | 2.03       | 0.95866               |
|                | 9          | Karinkanta et al. 2007             | 0.33      | 0.01       | 7.93       | 0.52568               |
|                | 10         | Kemmler et al. 2010                | 0.33      | 0.01       | 8.10       | 0.52704               |
|                | 11         | King et al. 2002                   | 0.32      | 0.01       | 7.68       | 0.51168               |
|                | 12         | Kovács et al. 2013                 | 0.40      | 0.14       | 1.17       | 0.09039               |
|                | 13         | Lam et al. 2012                    | 0.64      | 0.06       | 7.05       | 0.72673               |
|                | 14         | Lam et al. 2015                    | 0.30      | 0.03       | 2.82       | 0.30309               |
|                | 15         | Lord et al. 2003                   | 4.84      | 0.55       | 42.33      | 0.15519               |
|                | 16         | Merom et al. 2015                  | 1.36      | 0.22       | 8.23       | 0.75225               |
|                | 17         | Pahor et al. 2006                  | 0.99      | 0.14       | 6.97       | 0.99276               |
|                | 18         | Pahor et al. 2014/Gill et al. 2016 | 1.14      | 0.76       | 1.71       | 0.53739               |
|                | 19         | Patil et al. 2015                  | 0.11      | 0.01       | 2.04       | 0.10355               |
|                | 20         | Pitkälä et al. 2013                | 0.25      | 0.06       | 1.14       | 0.06455               |
|                | 21         | Prescott et al. 2008               | 0.42      | 0.08       | 2.12       | 0.30363               |
|                | 22         | Rejeski et al. 2017                | 0.34      | 0.01       | 8.16       | 0.53914               |
|                | 23         | Rolland et al. 2007                | 0.88      | 0.34       | 2.28       | 0.80441               |
|                | 24         | Sherrington et al. 2014            | 1.10      | 0.46       | 2.63       | 0.84135               |
|                | 25         | Underwood et al. 2013              | 1.06      | 0.84       | 1.35       | 0.64301               |
|                | 26         | Van Uffelen et al. 2008            | 0.36      | 0.01       | 8.72       | 0.56573               |
|                | 27         | von Stengel et al. 2011            | 0.34      | 0.01       | 8.15       | 0.53907               |
|                | 28         | Voukelatos et al. 2015             | 9.09      | 0.49       | 167.75     | 0.13843               |
|                | 29         | Wolf et al. 2003                   | 0.97      | 0.14       | 6.86       | 0.97786               |

(continued)

| Outcome         | No. | Base Study ID (n=69)               | RR   | LCL  | UCL    | p-value        |
|-----------------|-----|------------------------------------|------|------|--------|----------------|
| Hospitalization | 30  | Belardinelli et al. 2012           | 0.30 | 0.15 | 0.62   | <b>0.00092</b> |
|                 | 31  | O'Connor et al. 2009               | 0.97 | 0.91 | 1.03   | 0.34039        |
|                 | 32  | Hambrecht et al. 2004              | 0.16 | 0.02 | 1.31   | 0.08551        |
|                 | 33  | Hewitt et al. 2018                 | 0.64 | 0.27 | 1.50   | 0.31209        |
|                 | 34  | Kovács et al. 2013                 | 2.00 | 0.19 | 21.21  | 0.57619        |
|                 | 35  | Messier et al. 2013                | 8.54 | 0.46 | 157.06 | 0.14992        |
|                 | 36  | Mustata et al. 2011                | 0.33 | 0.02 | 7.32   | 0.47075        |
|                 | 37  | Pahor et al. 2006                  | 0.99 | 0.68 | 1.44   | 0.96195        |
|                 | 38  | Pahor et al. 2014/Gill et al. 2016 | 1.10 | 0.99 | 1.22   | 0.07332        |
|                 | 39  | Pitkala et al. 2013                | 0.78 | 0.55 | 1.12   | 0.17166        |
|                 | 40  | Rejeski et al. 2017                | 3.04 | 0.13 | 73.46  | 0.50161        |
|                 | 41  | Rolland et al. 2007                | 1.82 | 0.95 | 3.49   | 0.07083        |
| Injurious falls | 42  | Barnett et al. 2003                | 0.77 | 0.48 | 1.21   | 0.27108        |
|                 | 43  | Campbell et al. 1997               | 0.67 | 0.45 | 1.00   | <b>0.04892</b> |
|                 | 44  | El-Khoury et al. 2015              | 0.90 | 0.78 | 1.05   | 0.16541        |
|                 | 45  | Hewitt et al. 2018                 | 0.58 | 0.42 | 0.81   | <b>0.00120</b> |
|                 | 46  | MacRae et al. 1994                 | 0.16 | 0.01 | 2.92   | 0.20731        |
|                 | 47  | Pahor et al. 2014/Gill et al. 2016 | 0.89 | 0.66 | 1.20   | 0.45350        |
|                 | 48  | Patil et al. 2015                  | 0.51 | 0.31 | 0.84   | <b>0.00810</b> |
|                 | 49  | Pitkälä et al. 2013                | 0.65 | 0.39 | 1.09   | 0.10016        |
| Fractures       | 50  | Reinsch et al. 1992                | 1.46 | 0.37 | 5.81   | 0.60232        |
|                 | 51  | Belardinelli et al. 2012           | 0.19 | 0.01 | 3.89   | 0.27847        |
|                 | 52  | O'Connor et al. 2009               | 0.60 | 0.32 | 1.11   | 0.10725        |
|                 | 53  | El-Khoury et al. 2015              | 0.88 | 0.60 | 1.25   | 0.50488        |
|                 | 54  | Gianoudis et al. 2014              | 3.00 | 0.12 | 72.57  | 0.51161        |
|                 | 55  | Hewitt et al. 2018                 | 0.80 | 0.20 | 3.11   | 0.76275        |
|                 | 56  | Karinkanta et al. 2007             | 1.00 | 0.15 | 6.73   | 1.00000        |
|                 | 57  | Kemmler et al. 2010                | 0.49 | 0.19 | 1.25   | 0.13795        |
|                 | 58  | Kovács et al. 2013                 | 3.00 | 0.13 | 71.56  | 0.50509        |
|                 | 59  | Lam et al. 2012                    | 1.27 | 0.06 | 28.95  | 0.88844        |
|                 | 60  | Pahor et al. 2014/Gil et al. 2016  | 0.87 | 0.63 | 1.19   | 0.39774        |
|                 | 61  | Patil et al. 2015                  | 0.66 | 0.28 | 1.59   | 0.35403        |
|                 | 62  | Pitkälä et al. 2013                | 1.00 | 0.26 | 3.84   | 1.00000        |
|                 | 63  | Reinsch et al. 1992                | 0.45 | 0.04 | 4.78   | 0.52344        |
|                 | 64  | Rolland et al. 2007                | 2.50 | 0.50 | 12.44  | 0.26692        |
|                 | 65  | Sherrington et al. 2014            | 0.92 | 0.46 | 1.85   | 0.82585        |
|                 | 66  | Underwood et al. 2013              | 1.05 | 0.63 | 1.74   | 0.86094        |
|                 | 67  | Villareal et al. 2011              | 0.52 | 0.05 | 5.39   | 0.59601        |
|                 | 68  | von Stengel et al. 2011            | 0.58 | 0.18 | 1.87   | 0.36778        |
|                 | 69  | Wolf et al. 2003                   | 0.78 | 0.17 | 3.67   | 0.76405        |

#### Sources:

- 1 de Souto Barreto P, Rolland Y, Vellas B, Maltais M. 2019. Association of long-term exercise training with risk of falls, fractures, hospitalizations, and mortality in older adults: a systematic review and meta-analysis. JAMA Intern Med. 179(3):394–405. <https://doi.org/10.1001/jamainternmed.2018.5406>.
- 2 Altman DG, Bland JM. 2011. How to obtain the p-value from a confidence interval. BMJ. 343:d2304. <https://doi.org/10.1136/bmj.d2304>.

## Supplemental Information, SI 6

### P-value Plot and Summary Statistics of Datasets from Meta-analysis of Smoking–Squamous Cell Carcinoma Risk after Lee et al. (2012)

p-Value plot for meta-analysis of observational datasets representing (ii) smoking–lung squamous cell carcinoma risk after Lee et al. (2012):<sup>1</sup>

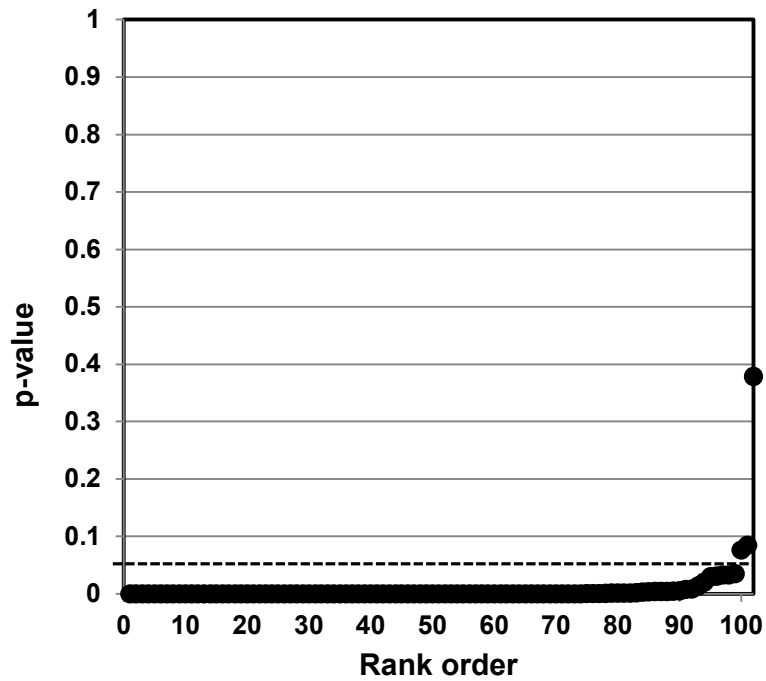

(Note below: Base study=base study 1<sup>st</sup> author name in Lee et al. (2012)<sup>1</sup>; RR=relative risk; LCL=lower confidence limit; UCL=upper confidence limit; p-value calculated after Altman and Bland (2011)<sup>2</sup>; bold, italicized p-value <.05)

Summary statistics for observational datasets representing smoking–lung squamous cell carcinoma risk:

| Place | No. | Base Study ID (n=102) | RR    | LCL   | UCL    | <i>p-value</i>        |
|-------|-----|-----------------------|-------|-------|--------|-----------------------|
| USA   | 1   | 1948 WYNDE4 m         | 12.79 | 6.19  | 26.14  | <b><i>0.0001</i></b>  |
|       | 2   | 1948 WYNDE4 f         | 2.82  | 2.55  | 13.31  | <b><i>0.01380</i></b> |
|       | 3   | 1949 BRESLO c         | 3.69  | 2.06  | 6.62   | <b><i>0.0001</i></b>  |
|       | 4   | 1952 HAMMON m         | 16.88 | 6.29  | 45.29  | <b><i>0.0001</i></b>  |
|       | 5   | 1955 HAENSZ f         | 3.00  | 1.90  | 4.73   | <b><i>0.0001</i></b>  |
|       | 6   | 1957 BYERS1 m         | 8.29  | 5.29  | 13.00  | <b><i>0.0001</i></b>  |
|       | 7   | 1960 LOMBA2 f         | 4.24  | 2.40  | 7.50   | <b><i>0.0001</i></b>  |
|       | 8   | 1962 WYNDE2 m         | 19.72 | 6.21  | 62.59  | <b><i>0.0001</i></b>  |
|       | 9   | 1964 OSANN2 f         | 35.10 | 4.80  | 256.00 | <b><i>0.00048</i></b> |
|       | 10  | 1966 WYNDE3 m         | 18.29 | 5.71  | 58.56  | <b><i>0.0001</i></b>  |
|       | 11  | 1966 WYNDE3 f         | 6.79  | 2.45  | 18.82  | <b><i>0.00025</i></b> |
|       | 12  | 1968 HINDS f          | 16.13 | 7.66  | 33.97  | <b><i>0.0001</i></b>  |
|       | 13  | 1969 STAYNE m         | 3.47  | 2.17  | 5.56   | <b><i>0.0001</i></b>  |
|       | 14  | 1969 WYNDE6 m         | 18.59 | 12.74 | 27.13  | <b><i>0.0001</i></b>  |
|       | 15  | 1969 WYNDE6 f         | 32.37 | 17.66 | 59.35  | <b><i>0.0001</i></b>  |
|       | 16  | 1975 COMSTO m         | 8.07  | 1.91  | 34.02  | <b><i>0.00452</i></b> |
|       | 17  | 1975 COMSTO f         | 46.20 | 2.74  | 778.83 | <b><i>0.00784</i></b> |
|       | 18  | 1976 BUFFLE m         | 14.03 | 4.73  | 41.61  | <b><i>0.0001</i></b>  |
|       | 19  | 1976 BUFFLE f         | 13.04 | 3.99  | 42.66  | <b><i>0.0001</i></b>  |
|       | 20  | 1979 CORREA c         | 28.30 | 18.60 | 43.20  | <b><i>0.0001</i></b>  |
|       | 21  | 1979 SIEMIA m         | 22.70 | 6.90  | 75.20  | <b><i>0.0001</i></b>  |
|       | 22  | 1980 DORGAN m         | 18.90 | 7.00  | 51.30  | <b><i>0.0001</i></b>  |
|       | 23  | 1980 DORGAN f         | 11.10 | 7.20  | 17.10  | <b><i>0.0001</i></b>  |
|       | 24  | 1981 JAIN m           | 18.00 | 5.50  | 111.00 | <b><i>0.00018</i></b> |
|       | 25  | 1981 JAIN f           | 25.50 | 7.93  | 156.00 | <b><i>0.0001</i></b>  |
|       | 26  | 1981 WU f             | 24.29 | 3.40  | 173.76 | <b><i>0.00153</i></b> |
|       | 27  | 1983 BAND m           | 37.45 | 17.60 | 79.58  | <b><i>0.0001</i></b>  |
|       | 28  | 1984 BROWN2 m         | 11.10 | 9.50  | 12.90  | <b><i>0.0001</i></b>  |
|       | 29  | 1984 BROWN2 f         | 20.10 | 16.40 | 24.80  | <b><i>0.0001</i></b>  |



(continued)

| Place  | No. | Base Study ID (n=102) | RR    | LCL   | UCL     | <i>p-value</i> |
|--------|-----|-----------------------|-------|-------|---------|----------------|
| USA    | 30  | 1984 OSANN m          | 36.10 | 17.80 | 73.30   | <b>0.0001</b>  |
|        | 31  | 1984 OSANN f          | 26.40 | 14.50 | 48.10   | <b>0.0001</b>  |
|        | 32  | 1984 SCHWAR m1        | 32.81 | 4.48  | 240.23  | <b>0.0001</b>  |
|        | 33  | 1984 SCHWAR m2        | 1.81  | 0.50  | 6.78    | 0.37881        |
|        | 34  | 1984 SCHWAR f1        | 43.23 | 2.60  | 718.15  | <b>0.00862</b> |
|        | 35  | 1984 SCHWAR f2        | 62.61 | 3.64  | 1076.10 | <b>0.00441</b> |
|        | 36  | 1985 KHUDER m         | 7.82  | 3.87  | 15.77   | <b>0.0001</b>  |
|        | 37  | 1986 ANDERS f         | 25.57 | 10.29 | 63.56   | <b>0.0001</b>  |
| Europe | 38  | 1989 HEGMAN c         | 30.80 | 12.48 | 76.03   | <b>0.0001</b>  |
|        | 39  | 1947 ORMOS m          | 10.14 | 2.41  | 42.79   | <b>0.00165</b> |
|        | 40  | 1948 DOLL m           | 13.17 | 4.12  | 42.10   | <b>0.0001</b>  |
|        | 41  | 1948 DOLL f           | 2.13  | 1.06  | 4.27    | <b>0.03311</b> |
|        | 42  | 1948 KREYBE m         | 10.87 | 3.47  | 34.04   | <b>0.0001</b>  |
|        | 43  | 1948 KREYBE f         | 2.29  | 0.89  | 5.88    | 0.08506        |
|        | 44  | 1954 STASZE m         | 57.77 | 3.58  | 933.17  | <b>0.00430</b> |
|        | 45  | 1954 STASZE f         | 32.45 | 1.32  | 800.04  | <b>0.03297</b> |
|        | 46  | 1959 TIZZAN c         | 2.70  | 1.99  | 3.67    | <b>0.0001</b>  |
|        | 47  | 1964 ENGELA m         | 6.45  | 1.97  | 21.11   | <b>0.00211</b> |
|        | 48  | 1966 TOKARS c         | 6.80  | 1.20  | 38.70   | <b>0.03026</b> |
|        | 49  | 1971 NOU m            | 27.17 | 6.60  | 11.85   | <b>0.0001</b>  |
|        | 50  | 1971 NOU f            | 7.09  | 1.35  | 37.19   | <b>0.02043</b> |
|        | 51  | 1972 DAMBER m         | 11.80 | 6.40  | 23.00   | <b>0.0001</b>  |
|        | 52  | 1975 ABRAHA m         | 92.66 | 5.77  | 1488.21 | <b>0.00143</b> |
|        | 53  | 1975 ABRAHA f         | 5.35  | 2.22  | 12.90   | <b>0.00021</b> |
|        | 54  | 1976 LUBIN2 m         | 16.66 | 12.69 | 21.86   | <b>0.0001</b>  |
|        | 55  | 1976 LUBIN2 f         | 5.78  | 4.34  | 7.71    | <b>0.0001</b>  |
|        | 56  | 1977 ALDERS m         | 14.70 | 3.40  | 63.64   | <b>0.00035</b> |
|        | 57  | 1977 ALDERS f         | 6.09  | 2.68  | 13.82   | <b>0.0001</b>  |
|        | 58  | 1979 BARBON m         | 14.52 | 6.35  | 33.20   | <b>0.0001</b>  |
|        | 59  | 1979 DOSEME m         | 3.60  | 2.60  | 5.00    | <b>0.0001</b>  |
|        | 60  | 1980 JEDRYC m         | 12.84 | 5.58  | 29.55   | <b>0.0001</b>  |
|        | 61  | 1983 SVENSS f         | 12.62 | 3.97  | 40.14   | <b>0.0001</b>  |
|        | 62  | 1985 BECHER f         | 10.69 | 2.43  | 47.00   | <b>0.00177</b> |
|        | 63  | 1987 KATSOU f         | 6.11  | 2.69  | 13.87   | <b>0.0001</b>  |
|        | 64  | 1988 JAHN m           | 23.03 | 7.29  | 72.81   | <b>0.0001</b>  |
| Asia   | 65  | 1961 ISHIMA c         | 21.00 | 3.38  | 868.40  | <b>0.03122</b> |
|        | 66  | 1964 JUSSAW m         | 25.43 | 13.87 | 46.63   | <b>0.0001</b>  |
|        | 67  | 1965 MATSUD m         | 39.01 | 5.44  | 279.84  | <b>0.00029</b> |
|        | 68  | 1976 CHAN m           | 15.22 | 3.61  | 64.12   | <b>0.00023</b> |
|        | 69  | 1976 CHAN f           | 6.44  | 3.44  | 12.06   | <b>0.0001</b>  |
|        | 70  | 1976 LAMWK2 m         | 6.89  | 2.65  | 17.90   | <b>0.0001</b>  |
|        | 71  | 1976 LAMWK2 f         | 6.49  | 3.27  | 12.88   | <b>0.0001</b>  |

(continued)

| Place | No. | Base Study ID (n=102) | RR    | LCL   | UCL     | <i>p-value</i> |
|-------|-----|-----------------------|-------|-------|---------|----------------|
| Asia  | 72  | 1976 TSUGAN m         | 14.55 | 0.75  | 283.37  | 0.07657        |
|       | 73  | 1978 ZHOU m           | 3.14  | 1.90  | 5.18    | <b>0.0001</b>  |
|       | 74  | 1978 ZHOU f           | 3.81  | 1.50  | 9.68    | <b>0.00496</b> |
|       | 75  | 1981 KOO f            | 4.15  | 2.46  | 6.98    | <b>0.0001</b>  |
|       | 76  | 1981 LAMWK f          | 10.54 | 4.19  | 26.52   | <b>0.0001</b>  |
|       | 77  | 1981 XU3 m            | 5.90  | 1.69  | 20.57   | <b>0.00540</b> |
|       | 78  | 1981 XU3 f            | 25.67 | 4.99  | 131.94  | <b>0.00012</b> |
|       | 79  | 1982 ZHENG m          | 16.82 | 6.05  | 46.71   | <b>0.0001</b>  |
|       | 80  | 1982 ZHENG f          | 5.45  | 3.11  | 9.54    | <b>0.0001</b>  |
|       | 81  | 1983 LAMTH f          | 8.10  | 4.16  | 15.77   | <b>0.0001</b>  |
|       | 82  | 1984 GAO m            | 8.40  | 4.70  | 15.00   | <b>0.0001</b>  |
|       | 83  | 1984 GAO f            | 7.20  | 4.60  | 11.10   | <b>0.0001</b>  |
|       | 84  | 1984 LUBIN m          | 6.33  | 2.29  | 17.45   | <b>0.00040</b> |
|       | 85  | 1985 CHOI m           | 5.45  | 2.34  | 12.67   | <b>0.0001</b>  |
|       | 86  | 1985 CHOI f           | 6.94  | 2.68  | 17.96   | <b>0.0001</b>  |
|       | 87  | 1985 WUWILL f         | 4.20  | 3.00  | 5.90    | <b>0.0001</b>  |
|       | 88  | 1986 SOBUE m          | 17.88 | 7.82  | 40.87   | <b>0.0001</b>  |
|       | 89  | 1986 SOBUE f          | 8.74  | 5.09  | 15.02   | <b>0.0001</b>  |
|       | 90  | 1988 WAKAI m          | 8.61  | 2.08  | 35.72   | <b>0.00305</b> |
|       | 91  | 1988 WAKAI f          | 25.23 | 6.87  | 92.66   | <b>0.0001</b>  |
|       | 92  | 1990 FAN c            | 11.68 | 5.04  | 27.04   | <b>0.0001</b>  |
|       | 93  | 1990 GER c            | 3.19  | 1.08  | 9.42    | <b>0.03547</b> |
|       | 94  | 1990 LUO c            | 10.90 | 2.50  | 47.90   | <b>0.00157</b> |
|       | 95  | 1991 KIHARA c         | 26.97 | 10.84 | 67.08   | <b>0.0001</b>  |
|       | 96  | 1997 SEOW f           | 17.50 | 6.95  | 44.09   | <b>0.0001</b>  |
| Other | 97  | 1978 JOLY m           | 31.21 | 7.69  | 126.68  | <b>0.0001</b>  |
|       | 98  | 1978 JOLY f           | 18.56 | 7.74  | 44.51   | <b>0.0001</b>  |
|       | 99  | 1987 PEZZOT m         | 62.74 | 3.86  | 1019.50 | <b>0.00367</b> |
|       | 100 | 1991 SUZUK2 c         | 31.00 | 4.20  | 227.00  | <b>0.00078</b> |
|       | 101 | 1993 DESTE2 m         | 13.20 | 4.70  | 37.10   | <b>0.0001</b>  |
|       | 102 | 1994 MATOS m          | 8.08  | 2.58  | 25.50   | <b>0.00038</b> |

#### **Sources:**

- 1 Lee PN, Forey BA, Coombs KJ. 2012. Systematic review with meta-analysis of the epidemiological evidence in the 1900s relating smoking to lung cancer. BMC Cancer. 12:385 (90pp.). <https://doi.org/10.1186/1471-2407-12-385>.
- 2 Altman DG, Bland JM. 2011. How to obtain the p-value from a confidence interval. BMJ. 343:d2304. <https://doi.org/10.1136/bmj.d2304>.

## Supplemental Information, SI 7

### Asthma Characteristics

**Table of asthma characteristics:**

| Possible risk factors for development of asthma in children & adults: |                                              | Possible triggering/precipitating factors for exacerbations in children & adults: |
|-----------------------------------------------------------------------|----------------------------------------------|-----------------------------------------------------------------------------------|
| <i>(1) Induction (sensitization) phase</i>                            | <i>(2) Maintenance (progression) phase</i>   |                                                                                   |
| <u>Host factors</u>                                                   | <u>Environmental stimuli</u>                 |                                                                                   |
| - genetic predisposition                                              | - allergens                                  | - emotional factors (stress)                                                      |
| - gender                                                              | - respiratory infections (viruses, bacteria) | - exercise-induced                                                                |
| - pre-term delivery (e.g., prematurity causes lung problems)          | - tobacco smoke                              | - foods, additives                                                                |
|                                                                       | - indoor/outdoor air quality                 | - hormonal factors (premenstrual worsening)                                       |
|                                                                       | - occupational sensitizer                    | - indoor/outdoor allergens                                                        |
|                                                                       |                                              | - indoor/outdoor air quality                                                      |
| <u>Environmental stimuli</u>                                          |                                              | - indoor irritants (household sprays, paint fumes)                                |
| - allergens                                                           |                                              | - medications (aspirin, nonsteroidal anti-inflammatory drugs, $\beta$ -blockers)  |
| - respiratory infections (viruses)                                    |                                              | - occupational agents                                                             |
|                                                                       |                                              | - substance abuse                                                                 |
|                                                                       |                                              | - tobacco smoke                                                                   |
|                                                                       |                                              | - uncontrolled allergic rhinitis, sinusitis, respiratory viral infections         |
|                                                                       |                                              | - weather changes (e.g., temperature, humidity)                                   |

Notes: (1) after references 1–10 listed at the end; (2) All these factors have support in the scientific literature; some are based on associations, and some may be directly causative.

### Proposed childhood asthma causes and risks (Noutsiosa and Floros<sup>2</sup>):

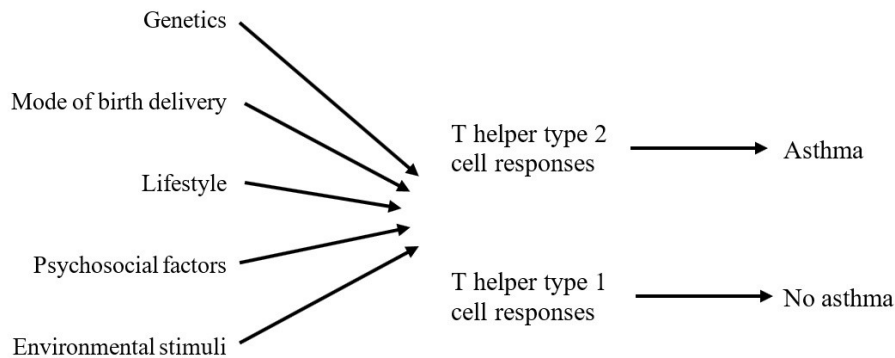

#### a) Development of asthma

Asthma is associated with three principal characteristics (Pillai and Calhoun,<sup>1</sup> Noutsios and Floros<sup>2</sup>): (1) variable airways obstruction, (2) airway hyperresponsiveness, and spasm with wheezing and coughing and (3) airway inflammation. Clinically asthma is characterized by episodic, reversible obstructive airways obstruction that variably presents as a variety of symptoms from cough to wheezing, shortness of breath, or chest tightness (Busse and Lemanske)<sup>3</sup>.

The underlying pathology of asthma, regardless of its severity, is chronic inflammation of the airways and reactivity/spasm of the airways. A combined contribution of genetic predisposition and non-genetic factors account for divergence of the immune system towards T helper (Th) type 2 cell responses that include production of pro-inflammatory cytokines, Immunoglobulin E (IgE) antibodies and eosinophil infiltrates (circulating granulocytes) known to associate with asthma (Noutsiosa and Floros<sup>2</sup>). The release of pro-inflammatory cytokines that cause airway narrowing is responsible for cough, shortness of breath, wheezing and chest tightness characteristic of the asthmatic state (Bernstein<sup>4</sup>). But this fails to account for beta stimulus of bronchiolar muscles that increases airway spasm. Airway inflammation causes secretions and contributes to edema (swelling) but it does not cause hyperresponsiveness.

During exacerbations these airway narrowing processes are accentuated, but it is not completely clear how these events contribute to these underlying changes and the mechanisms underlying an increase in airflow obstruction are not fully understood (Singh and Busse<sup>5</sup>). There is also ongoing debate as to whether asthma is one disease or several different diseases that include airway inflammation; however two thirds (or more) of asthmatic patients have an allergic component to their disease and are felt to have allergic asthma (Scherzer and Grayson<sup>6</sup>). Not enough is currently known to rule out allergic causes for a vast majority of asthma problems. As for development of the disease, asthma frequently first expresses itself early in the first few years of life arising from a combination of host and other factors. Most investigators would agree there is a major hereditary contribution to the underlying causes of asthma and allergic diseases (Lemanske and Busse<sup>7</sup>).

*b) Triggering/precipitating factors*

Respiratory viruses are present in a majority of asthmatic children during episodes of exacerbation (Johnston<sup>8</sup>, Szeffler<sup>9</sup>, Costa et al.<sup>10</sup>). Airways are made more reactive by infection, so asthmatic children have episodes of asthma that are aggravated or initiated by respiratory infections.

Mechanisms by which air quality components are hypothesized to contribute to asthma exacerbation in subjects with existing airway allergies are thru immune responses, for example:

- Producing Immunoglobulin E antibody responses in the immune system – alteration of T regulatory cell function (which has a role in regulating or suppressing other cells

in the immune system) and changes in FEV<sub>1</sub> (forced expiratory volume in 1 second) (Diaz-Sanchez et al.<sup>11</sup>, Nadeau et al.<sup>12</sup>). However, changes in FEV<sub>1</sub> are only a measure of airway obstruction and not evidence of a causal factor.

- Modulating or activating inflammasomes (Bauer et al.<sup>13</sup>). Inflammasomes are cytosolic multiprotein oligomers of the innate immune system responsible for activation of inflammatory responses (Latz et al.<sup>14</sup>). They are key signalling platforms that detect pathogenic microorganisms and sterile stressors, and that activate highly pro-inflammatory cytokines interleukin-1 $\beta$  (IL-1 $\beta$ ) and IL-18.
- Impairing defences of the airway epithelium through reduced barrier function, impaired host defence to pathogens, and inflammatory responses from generation of reactive oxygen species (ROS) and resultant oxidative stress (Huang et al.<sup>15</sup>, De Grove et al.<sup>16</sup>, Huff et al.<sup>17</sup>).

From an exposure point-of-view, isolating the role/contribution of a particular triggering/precipitating factor in an asthma exacerbation episode is difficult, unless the factor overwhelms. Asthma is a complex interaction between the inhaled environment and the formed elements of the airways. The hypothesis is that exposure to abruptly changing air quality conditions may contribute to symptoms and increase the severity of asthma exacerbations (Holgate<sup>18</sup>); although these effects are not as pronounced as those of viruses and aeroallergens (Trasande and Thurston<sup>19</sup>). By the examination of multiple air quality component–asthma exacerbation observational studies, our study helps judge if this hypothesis is supported.

Because of multiple triggering/precipitating factors that may be at play, D’Amato et al.<sup>20</sup> indicate it is challenging to evaluate the role of air quality on the timing of asthma exacerbations and on the prevalence of asthma in general. For example, enhanced Immunoglobulin E antibody-mediated response to aeroallergens and resulting enhanced airway inflammation could account for increasing frequency of allergic respiratory allergy and bronchial asthma often attributed to air quality components in observational studies.

### *c) Seasonality*

There is seasonal variation in hospitalization of children due to asthma exacerbations, with fewer hospitalizations in summer and more in fall and winter in North America (e.g., United States – Kimes et al.<sup>21</sup> and Sokol et al.<sup>22</sup>; Canada – Crighton et al.<sup>23</sup> and Johnston<sup>8</sup>). As for adults ( $\geq 50$  years), Johnston<sup>8</sup> reports that a major asthma exacerbation epidemic occurs

annually during the Christmas period, and hovers near average levels for the remainder of the year other than a mild peak in early spring.

International studies reveal the same seasonal variation in asthma exacerbations and peak hospitalizations of children in fall – England (Khot et al.<sup>24</sup>, Jackson et al.<sup>25</sup>), Netherlands (Koster et al.<sup>26</sup>), Finland (Harju et al.<sup>27</sup>), Norway (Carlsen et al.<sup>28</sup>), Malta (Grech et al.<sup>29</sup>), New Zealand (Kimbell-Dunn et al.<sup>30</sup>), Israel (Garty et al.<sup>31</sup>), Taiwan (Xirasagar et al.<sup>32</sup>) and Hong Kong (Tseng et al.<sup>33</sup>).

Asthma exacerbations are not so problematic in summer except for those asthmatics that are triggered by seasonal allergens that appear in summer. The onset of cooler weather brings on asthma exacerbations. Wintertime allergenic stimulants is more a problem of inside air—insect offal and dander and household allergens as well as mold in closed in housing or other allergens that are accentuated by inside living. There is also the well-known asthmatic trigger of cooler or cold air.

Possible causes of higher rates of asthma hospitalizations in fall proposed by others include climate factors, increased incidence of viral infections and changes in air quality components (Xirasagar et al.<sup>32</sup>, Jackson et al.<sup>25</sup>, Koster et al.<sup>26</sup>, Sokol et al.<sup>22</sup>). However, house mold and dander as well as insect offal and detritus may also be at play. Crighton et al.<sup>23</sup> stated that ambient levels of air pollutants vary significantly from place to place, and in Ontario Canada these levels typically peak during summer months when asthma hospitalizations are at their lowest. Warmer summer temperatures typically result in an increase in levels of ozone precursors and ozone yet asthma hospitalizations decline. Rather than there being a number of single spiked events such as abrupt changes (increases) in air quality components on a given day, there is more likely to be other triggering/precipitating factors that accumulate and diminish over many days to weeks that more plausibly explain asthma hospitalizations of children in the fall in North America (Kimes et al.<sup>21</sup>).

*d) Sources:*

- 1 Pillai RA, Calhoun WJ. 2014. Introduction to asthma and phenotyping. In: Heterogeneity in Asthma (Ed: Brasier AR). Advances in Experimental Medicine and Biology 795, Springer, NY, New York. pp 5–16.
- 2 Noutsios GT, Floros J. 2014. Childhood asthma: causes, risks, and protective factors; a role of innate immunity. Swiss Med Weekly. 44:w14036. <https://doi.org/10.4414/smw.2014.14036>.
- 3 Busse WW, Lemanske RF. 2001. Asthma. New England J Med. 344:350–362. <https://doi.org/10.1056/NEJM200102013440507>.

- 4 Bernstein DI. 2008. ABCs of asthma. *Clinical Cornerstone*. 8(4):9–25.  
[https://doi.org/10.1016/S1098-3597\(08\)80010-5](https://doi.org/10.1016/S1098-3597(08)80010-5).
- 5 Singh AM, Busse WW. 2006. Asthma exacerbations 2: aetiology. *Thorax*. 61(9):809–816.  
<https://doi.org/10.1136/thx.2005.045179>.
- 6 Scherzer R, Grayson MH. 2018. Heterogeneity and the origins of asthma. *Ann Allergy Asthma Immunol*. 121(4):400–405. <https://doi.org/10.1016/j.anai.2018.06.009>.
- 7 Lemanske RF, Busse WW. 2003. Asthma. *J Allergy Clin Immunol*. 111(2, Suppl 2):S502–S519.  
<https://doi.org/10.1067/mai.2003.94>.
- 8 Johnston NW. 2007. The similarities and differences of epidemic cycles of chronic obstructive pulmonary disease and asthma exacerbations. *Proc Am Thorac Soc*. 4:591–596.  
<https://doi.org/10.1513/pats.200706-064TH>.
- 9 Szeftler SJ. 2008. Asthma exacerbations: Putting a lid on the volcano. *J Allergy Clin Immunol*. 122(4):697–699. <https://doi.org/10.1016/j.jaci.2008.08.022>.
- 10 Costa, LDC, Costa PS, Camargos PAM. 2014. Exacerbation of asthma and airway infection: is the virus the villain? *J de Pediatria (Rio J)*. 90:542–555.  
<https://doi.org/10.1016/j.jped.2014.07.001>.
- 11 Diaz-Sanchez D, Garcia MP, Wang M, Jyrala M, Saxon A. 1999. Nasal challenge with diesel exhaust particles can induce sensitization to a neoallergen in the human mucosa. *J Allergy Clin Immunol*. 104(6):1183–1188. [https://doi.org/10.1016/S0091-6749\(99\)70011-4](https://doi.org/10.1016/S0091-6749(99)70011-4).
- 12 Nadeau K, McDonald-Hyman C, Noth EM, Pratt B, Hammond SK, Balmes J, Tager I. 2010. Ambient air pollution impairs regulatory T-cell function in asthma. *J Allergy Clin Immunol*. 126(4):845–852. <https://doi.org/10.1016/j.jaci.2010.08.008>.
- 13 Bauer RN, Diaz-Sanchez D, Jaspers I. 2012. Effects of air pollutants on innate immunity: the role of Toll-like receptors and nucleotide-binding oligomerization domain-like receptors. *J Allergy Clin Immunol*. 129(1):14–24. <https://doi.org/10.1016/j.jaci.2011.11.004>.
- 14 Latz E, Xiao TS, Stutz A. 2013. Activation and regulation of the inflammasomes. *Nature Rev Immunol*. 13:397–411. <https://doi.org/10.1038/nri3452>.
- 15 Huang S-K, Zhang Q, Qiu Z, Chung KF. 2015. Mechanistic impact of outdoor air pollution on asthma and allergic diseases. *J Thorac Dis*. 7(1):23–33. <https://doi.org/10.3978/j.issn.2072-1439.2014.12.13>.
- 16 De Grove KC, Provoost S, Brusselle GG, Joos GF, Maes T. 2018. Insights in particulate matter-induced allergic airway inflammation: focus on the epithelium. *Clin Exp Allergy*. 48(7):773–786.  
<https://doi.org/10.1111/cea.13178>.
- 17 Huff RD, Carlsten C, Hirota JA. 2019. An update on immunologic mechanisms in the respiratory mucosa in response to air pollutants. *J Allergy Clin Immunol*. 143(6):1989–2001.  
<https://doi.org/10.1016/j.jaci.2019.04.012>.
- 18 Holgate ST. 2010. Has the time come to rethink the pathogenesis of asthma? *Curr Opin Allergy Clin Immunol*. 10(1):48–53. <https://doi.org/10.1097/ACI.0b013e3283347be5>.
- 19 Trasande L, Thurston GD. 2005. The role of air pollution in asthma and other pediatric morbidities. *J Allergy Clin Immunol*. 115:689–699. <https://doi.org/10.1016/j.jaci.2005.01.056>.

- 20 D'Amato G, Liccardi G, D'Amato M, Holgate S. 2005. Environmental risk factors and allergic bronchial asthma. *Clin Exp Aller*. 35:1113–1124. <https://doi.org/10.1111/j.1365-2222.2005.02328.x>.
- 21 Kimes D, Levine E, Timmins S, Weiss SR, Bollinger ME, Blaisdell C. 2004. Temporal dynamics of emergency department and hospital admission of pediatric asthmatics. *Environ Res*. 94:7–17. [https://doi.org/10.1016/S0013-9351\(03\)00046-X](https://doi.org/10.1016/S0013-9351(03)00046-X).
- 22 Sokol K, Sur S, Ameredes BT. 2014. Inhaled environmental allergens and toxicants as determinants of the asthma phenotype. In: *Heterogeneity in Asthma* (Ed: Brasier AR). *Advances in Experimental Medicine and Biology* 795. NY, New York: Springer. pp 43–73.
- 23 Crichton EJ, Mamdani MM, Upshur REG. 2001. A population based time series analysis of asthma hospitalisations in Ontario, Canada: 1988 to 2000. *BMC Health Serv Res*. 1:7. <https://doi.org/10.1186/1472-6963-1-7>.
- 24 Khot A, Bum R, Evans N, Lenney C, Lenney W. 1984. Seasonal variation and time trends in childhood asthma in England and Wales 1975–81. *Br Med J (Clin Res Ed)*. 289(6439):235–237. <https://doi.org/10.1136/bmj.289.6439.235>.
- 25 Jackson DJ, Sykes A, Mallia P, Johnston SL. 2011. Asthma exacerbations: origin, effect, and prevention. *J Aller Clin Immunol*. 128(6):1165–1174. <https://doi.org/10.1016/j.jaci.2011.10.024>.
- 26 Koster ES, Raaijmakers JA, Vijverberg SJ, van der Ent CK, Maitland-van der Zee AH. 2011. Asthma symptoms in pediatric patients: differences throughout the seasons. *J Asthma*. 48(7):694–700. <https://doi.org/10.3109/02770903.2011.601780>.
- 27 Harju T, Keistinen T, Tuuponen T, Kivela SL. 1997. Seasonal variation in childhood asthma hospitalisations in Finland, 1972–1992. *Eur J Pediatr*. 156(6):436–439. <https://doi.org/10.1007/s004310050632>.
- 28 Carlsen KH, Orstavik I, Leegaard J, Hoeg H. 1984. Respiratory virus infections and aeroallergens in acute bronchial asthma. *Arch Dis Child*. 59:310–315. <https://doi.org/10.1136/adc.59.4.310>.
- 29 Grech V, Balzan M, Asciak RP, Buhagiar A. 2002. Seasonal variations in hospital admissions for asthma in Malta. *J Asthma*. 39(3):263–268. <https://doi.org/10.1081/jas-120002476>.
- 30 Kimbell-Dunn M, Pearce N, Beasley R. 2000. Seasonal variation in asthma hospitalizations and death rates in New Zealand. *Respirology*. 5:241–246. <https://doi.org/10.1046/j.1440-1843.2000.00255.x>.
- 31 Garty BZ, Kosman E, Ganor E, Berger V, Garty L, Wietzen T, et al. 1998. Emergency room visits of asthmatic children, relation to air pollution, weather and airborne allergens. *Ann Allergy Asthma Immunol*. 81(6):563–570. [https://doi.org/10.1016/S1081-1206\(10\)62707-X](https://doi.org/10.1016/S1081-1206(10)62707-X).
- 32 Xirasagar S, Lin H-C, Lui T-C. 2006. Seasonality in pediatric asthma admissions: The role of climate and environmental factors. *Eur J Pediatr*. 165(11):747–752. <https://doi.org/10.1007/s00431-006-0164-6>.
- 33 Tseng RY, Lo CN, Li CK, Ling TW, Mok MM. 1989. Seasonal asthma in Hong Kong and its management implications. *Ann Allergy*. 63(3):247–250.
